# Supplementary material for: Application of automated network generation for retrosynthetic planning of potential corrosion inhibitors
Source: Royal Society of Chemistry journal article supplement (doi:10.1039/d3me00162h), 2023-12-18
Supplement: d3me00162h1.csv [file d3me00162h1.csv]

BrC1=C2Oc3ccc4cccnc4c3C=C12
BrC1=CC(Br)C2=C1OCCO2
BrC1=CC(Sc2ccccn2)=C2C=CC=CC2O1
BrC1=CCC=CC(Sc2nc3ccccc3[nH]2)=C1
BrC1=CN=CSC=C(Sc2ncccn2)C=CC1
BrC1=NC(C2CCNCC2)=CC=CC1
BrC1=c2[nH]cc(C3CCNCC3)c2=CC=C=C1
BrC1=c2ncc3ccccc3c2=C1
BrC1C=C(Nc2nccs2)c2ccccc2O1
BrC1C=C(Sc2cccs2)c2ccccc2O1
BrC1C=C(Sc2nc3cccnc3[nH]2)c2ccccc2O1
BrC1C=C(Sc2nncs2)c2ccccc2O1
BrC1NN=C(c2ccncc2)O1
BrC1c2ncccc2-c2cccnc21
BrC=C1C=C(Sc2cccs2)c2ccccc2O1
BrC=C1C=C(c2ccccn2)Nc2ccccc2S1
BrC=C1CCOC1CSc1nc2ccccc2[nH]1
BrC=C1COCC1C=Cc1ccccc1
BrC=CC=CCc1ccccn1
BrC=CC=Cc1ccccn1
BrC=CC=NCc1ccccn1
BrC=Cc1ccc2ccccc2c1
BrC=Cc1ccccc1
BrCSc1ccccc1
BrN1C=Cc2ccccc2O1
Brc1c(Oc2ccccc2)ccc2c1CCC2
Brc1cc(-c2ccccn2)nc(-c2ccccn2)c1
Brc1cc(Br)c2[nH]oc2c1
Brc1cc(Br)c2c(c1)CN2
Brc1cc(Br)c2c(c1)N2
Brc1cc(Sc2ncc[nH]2)ccc1-c1conn1
Brc1cc2ccccc2cc1Br
Brc1cc[nH]c2ccccc2cnc1
Brc1ccc(-c2ccccc2)nc1
Brc1ccc(-c2ccn[nH]2)nc1-c1c[nH]cn1
Brc1ccc(-c2ccn[nH]2)nc1-c1ccn[nH]1
Brc1ccc(-c2ccn[nH]2)nc1-c1cocn1
Brc1ccc(-c2ccn[nH]2)nc1-c1cscn1
Brc1ccc(-n2cccn2)nc1-n1cccn1
Brc1ccc(-n2cccn2)nc1-n1ccnn1
Brc1ccc(Br)c2c1COCCO2
Brc1ccc(Br)c2c1OCCO2
Brc1ccc2c(c1Br)OCCO2
Brc1ccc2c3cn-3cccnc2c1
Brc1ccc2ccccc2c1
Brc1ccc2cccccc1-2
Brc1ccc2cccnc2c1
Brc1ccc2cccnc2c1Br
Brc1cccc(-c2ccncc2)c1
Brc1cccc(-c2ccncn2)c1
Brc1cccc(-c2cnc3ccccc3c2)c1
Brc1cccc(-c2cnc3ccccc3n2)c1
Brc1cccc(-c2n[nH]c(-c3ccccc3)n2)c1
Brc1cccc(-c2ncc[nH]2)c1
Brc1cccc(-c2nnc3ccccc3n2)c1
Brc1cccc(C2CCc3ccccc32)c1
Brc1cccc(C2Cc3ccccc3N2)c1
Brc1cccc(C=Cc2ccccn2)c1
Brc1cccc(CCCOCc2ccccc2)c1
Brc1cccc(CCOCCc2cccnc2)c1
Brc1cccc(N2CCc3ccccc32)c1
Brc1cccc(OC=CC=Nc2ccccc2)c1
Brc1cccc(Oc2ccnc3ccccc23)c1
Brc1cccc2ccccc12
Brc1cccc2cccnc12
Brc1cccc2n[nH]nc12
Brc1ccccc1
Brc1ccccc1-c1ccccc1
Brc1ccccc1-c1ncc[nH]1
Brc1cccnc2ccccc2ccc1
Brc1ccnc2ccccc12
Brc1ccnc2nccnc12
Brc1ccncc1-c1nn[nH]n1
Brc1cconc2ccccc2c(Sc2ccco2)c1
Brc1ccsc1
Brc1ccsc1-c1cc[nH]c1-c1cccs1
Brc1cnc2ccccc2c1
Brc1cnc2cnccc2c1
Brc1cncc2ccccc12
Brc1cnccc1-c1cccc(-c2ccn[nH]2)n1
Brc1cncnc1-c1ccccc1
Brn1ncnc1-c1ccccc1
C#CC(=CC=CCCCCCCCCCOCCCCCCCCC)OC
C#CC(=CC=CCCCCCCCOCCCCCCCCCCC)OC
C#CC(=CC=CNC(C=C)=CC=CN)Nc1ccc(Nc2ccccc2)cc1
C#CC(=CC=CNC1=C(C=CN)C1)Nc1ccc(Nc2ccccc2)cc1
C#CC(=CC=Cc1cc(CCCCNCCCCCCCCCCC)n[nH]1)OC
C#CC(=CC=Cc1nnc(-c2ccc(OC)cc2)n1N)OC
C#CC(=O)CC1CC2CCC1(C)C2(C)C
C#CC(=O)CCCCCCCCCC(=O)O
C#CC(=O)NC(O)C1(CC)CC(CC)C(CO)C1
C#CC(=O)NC1CC2CCC1(C)C2(C)C
C#CC(=O)NC=Cc1ccccc1
C#CC(=O)NCC(CC)CCCC
C#CC(=O)NCC(F)(F)C(F)C(F)(F)F
C#CC(=O)NCCC(CC)CCC
C#CC(=O)NCCCCCC
C#CC(=O)NCCCCCCCCC(N)CO
C#CC(=O)Nc1ccncc1
C#CC(=O)OC1CC2CCC1(C)C2(C)C
C#CC(=O)OC1CC2CCC1(C)C2(C)c1ccccc1
C#CC(=O)OC1CCC2CC1(C)C2(C)C
C#CC(=O)OCC(CC)CCC
C#CC(=O)OCC(CC)CCCC
C#CC(=O)OCC(CC)COCC
C#CC(=O)OCC(CO)(COC(C)=O)COC(=O)C=C
C#CC(=O)OCC(CO)(COC(C)=O)COC(C)C=C
C#CC(=O)OCC(CO)CCC
C#CC(=O)OCC(F)(F)C(F)(F)C(F)F
C#CC(=O)OCC(F)(F)F
C#CC(=O)OCCCCCC
C#CC(=O)OCCCCCC(C)(C)C
C#CC(=O)OCCCCCC(C)C
C#CC(=O)OCCCCCC(C)O
C#CC(=O)OCCCCCCCC(C)C
C#CC(=O)OCCCCCCCCC(=O)CO
C#CC(=O)OCCCCCCCCC(=O)O
C#CC(=O)OCCCCCCCCCO
C#CC(=O)OCCCCCCCCOCC
C#CC(=O)OCCCCCCCOC
C#CC(=O)OCCCCCCOC(=O)C=C
C#CC(=O)OCCCCCCOC(=O)c1cccnc1
C#CC(=O)OCCCCCCOC(=O)c1cccs1
C#CC(=O)OCCCCCOC(=O)C1CC1
C#CC(=O)OCCCCCOC(=O)C=CC
C#CC(=O)OCCCOCCCC(C)C
C#CC(=O)OCCCOCCCCC(C)C
C#CC(=O)OCCNCCC(C)C
C#CC(=O)OCCOCCCCOCCOC(=O)C1CC1
C#CC(=O)OCCOCCCOCCOCc1cccs1
C#CC(=O)OCCOCCOC(=O)C=C
C#CC(=O)OCCOCCOC(=O)c1ccccc1
C#CC(=O)OCCOCCOC(=O)c1cccnc1
C#CC(=O)OCCOCCOC(=O)c1cccs1
C#CC(=O)OCCOCCOC(C)=O
C#CC(=O)OCCOCCOCCOC(=O)c1cccnc1
C#CC(=O)OCCOCCOCCOC(C)=O
C#CC(=O)OCCOCCOCCOC(C)C
C#CC(=O)OCCOCCOCCOC1CCC(=O)OC1
C#CC(=O)Oc1ccccc1
C#CC(=O)Sc1cc2ccccc2o1
C#CC(=O)c1ccc(Nc2ccccc2)cc1
C#CC(Br)=CC=CNC(=O)c1ccccc1O
C#CC(C#N)C(O)C(O)C(O)CO
C#CC(C)(C)C=Cc1ccccc1
C#CC(C)(C)CCCCCCC(=O)O
C#CC(C)(C)COC(C)COC(C)COC(C)C
C#CC(C)(C)OCCOCCOC(=O)C=C
C#CC(C)(CO)C(=O)O
C#CC(C)(CO)CO
C#CC(C)(F)C(F)(F)F
C#CC(C)(O)CC(C)(O)O
C#CC(C)(O)CNCCCCCCCC
C#CC(C)(Sc1nc2ccccc2s1)C(N)=O
C#CC(C)(c1ccccc1)C1(C)NC(c2ccccc2)=CC1=O
C#CC(C)=C1C=C(O)C(NS(=O)(=O)c2ccsc2C(=O)O)=C1
C#CC(C)=CC=CCNC(=O)c1ccccc1O
C#CC(C)C(=O)CCCS(=O)(=O)O
C#CC(C)C(=O)OC(CC)CCCC
C#CC(C)C(=O)OCCCCCC
C#CC(C)C(=O)OCCCOC(=O)C(C)=O
C#CC(C)C(=O)OCCOC(=O)c1ccc2c(c1)C(=O)OC2
C#CC(C)C(=O)OCCOCCO
C#CC(C)C(=O)Oc1ccc(C(C)=O)cc1
C#CC(C)C(=O)c1ccc(C(=O)c2ccccc2)cc1
C#CC(C)C1CC(=O)OC1=O
C#CC(C)C1CCC(C(=O)O)C1
C#CC(C)CCCCCCCCCCO
C#CC(C)CCCCCCCCCOC(=O)OC
C#CC(C)CCCCCO
C#CC(C)CCCCOCCCCC(=O)O
C#CC(C)CCOCCCCCCC(=O)O
C#CC(C)N(C)COCCOCCO
C#CC(C)OC(=O)CCCCCC
C#CC(C)OC(=O)CCCCCCC
C#CC(C)OC(=O)CCCCCCCCCCCN(C)CCC=C
C#CC(C)OC(=O)CCCOC(=O)C(C)=O
C#CC(C)OC(=O)COCCOCCCOC(=O)OCCC
C#CC(C)OC(=O)NCCCCCCCCCOCCCCNCC
C#CC(C)OC(=O)c1cccc(C(=O)c2ccccc2)c1
C#CC(C)OCC(CO)(COC(=O)C=C)C(N)=O
C#CC(C)OCC(F)(F)C(F)C(F)(F)F
C#CC(C)OCCCCCCCCC(=O)O
C#CC(C)OCCCCCCCCCO
C#CC(C)OCCCCCCOC(=O)C=C
C#CC(C)c1cc2ccccc2cn1
C#CC(C)c1ccc2nc[nH]c2c1
C#CC(CC(CC)CCCC)OC
C#CC(CC(CO)C(C)C#N)OC
C#CC(CC)(CO)COCC(CC)(CO)CO
C#CC(CC)(CO)OCCC(CC)(CO)CCO
C#CC(CCC)C(=O)OCC(=C)C
C#CC(CCCC)C(=O)OCC(=C)C
C#CC(CCCC)CN(C)CC(=C)C
C#CC(CCCCC)OC(=O)C=C
C#CC(CO)(CO)C(=O)OC
C#CC(CO)(CO)CO
C#CC(CO)C(CC)OCC(CC)(CO)CO
C#CC(CO)C(CO)COCC(CC)(CO)CO
C#CC(CO)C(O)C(O)C(O)CO
C#CC(F)(F)C(F)(F)F
C#CC(F)=CC=CCOc1ccc(OC(=O)C(=C)C)cc1
C#CC(F)=Cc1cc(N)ccc1-c1ccc(N)cc1C(F)(F)F
C#CC(N)=CC=CCOC(=O)c1ccc(C(=O)c2ccc(N)cn2)cc1
C#CC(N)=CC=COC(=O)c1ccc(C(=O)Oc2ccc(N)c(F)c2)cc1
C#CC(N)=CC=COC(=O)c1ccc(C(=O)Oc2ccc(N)cn2)cc1
C#CC(N)=NC=Cc1cc(-c2ccc(Cl)cc2)cc(-c2ccc(N)cn2)c1
C#CC(O)(C=COCC(CC)(CO)CO)CC
C#CC(O)(CC)CC=C(C)CCC=C(C)C
C#CC(O)(c1ccccc1)C(O)C=NC(=CNO)c1ccccc1
C#CC(O)=CC=CCNC(=O)c1ccccc1O
C#CC(O)C(=O)OC1(CC)CC(CC)C(CO)C1
C#CC(O)C(=O)OC1(CC)CC(CC)C(CO)C1=O
C#CC(O)C(=O)OC1(CC)CC(O)C(CO)C(CC)C1
C#CC(O)C1CCC(C(=O)O)N1
C#CC(O)C=Cc1ccccc1
C#CC(O)CCCCCCCCCC(=O)O
C#CC(O)CCCCCCCCCCO
C#CC(O)CCCCCCCCCCOC(=O)O
C#CC(O)CCCCCCCCCO
C#CC(O)CCCCCS
C#CC(O)CCCCS
C#CC(O)COCCCCCCC(C)C
C#CC(O)c1cc2ccccc2cn1
C#CC(O)c1cccc2ccc(O)c-2n1
C#CC(Sc1nc2ccccc2[nH]1)c1cn(C)oc1=O
C#CC(Sc1nncs1)c1ccc(C)[nH]1
C#CC1(C)OC(=O)C2(CC)CC(C3=CC(O)C3)C12
C#CC1(C)OC(=O)OC12CCC1C(CC)C(CO)C12
C#CC1(C)OCC(CO)C(CC)C(CC)OC(=O)O1
C#CC1(O)C(=O)C2C=CCC(CC)(CO)C1C2O
C#CC1(O)C(=O)C2CCC(CC)C(CO)C1C2C
C#CC1(O)C(=O)N2CCC(OC)C(CO)C1C2C
C#CC1(O)C(=O)N2CCCC(CC)(CO)C1C2C
C#CC1(O)C(=O)OC(CC)C=CC2(CO)C(C)C12
C#CC1(O)C(=O)OC(CC)CC(C(C)(C)O)C1N
C#CC1(O)C(=O)OC(CC)CC(CC)C(CO)C1O
C#CC1(O)C(=O)OC(CC)CC1(C)C(C)CO
C#CC1(O)C(=O)OC(CC)CC12C=CC(CO)C2O
C#CC1(O)C(=O)OC(CC)CC1C1=CC(O)C(CO)C1
C#CC1(O)C(=O)OC(CC)CC2CCC1C2CO
C#CC1(O)C(=O)OC2(C)CCC(CC)C(CO)C21
C#CC1(O)C(=O)OC2(CC)CC(C)CC(CO)C21
C#CC1(O)C(=O)OC2(CC)CC(CC)(CC)OC21
C#CC1(O)C(=O)OC2(CC)CC(CC)C(OC)C21
C#CC1(O)C(=O)OC2(CC)CC(OC)=C(CO)C21
C#CC1(O)C(=O)OC2(CC)CC1C=C1CC(CO)C1O2
C#CC1(O)C(=O)OC2(CC)CC1CC(CO)C(OC)N2
C#CC1(O)C(=O)OC2(OC)CC(CC)C(CO)C21
C#CC1(O)C(=O)OC2CC(OC)C(CO)C1C2C
C#CC1(O)C(=O)OC2CCC1C(CO)C2CO
C#CC1(O)C(O)OC2(CC)CC(CC)C(CO)C21
C#CC1(O)CC(CC)(CO)CC(CC)OC1=O
C#CC1(O)CC(CO)C(C#N)C=C(CC)OC1=O
C#CC1(O)CC(CO)C(CC)CC(CC)OC1=O
C#CC1(O)CC(CO)CC(O)C(CC)C1(C)CC
C#CC1(O)CCC(C(=O)O)CC1
C#CC1(O)CCC(CC)(CO)CC(CC)OC1=O
C#CC1(O)COC(C)(CC)CC(CC)C(CO)CO1
C#CC1(O)COC2(CC)CC(CC)C(CO)C1C2
C#CC1(O)NC(=O)C2(CC)CC(CC)C(CO)C12
C#CC1(O)OC2(Cl)C(CC)(CO)CC2(CC)OC1=O
C#CC1(O)OCC(CO)C(CC)CC(CC)OC1=O
C#CC12OCC(CO)C(O)C1(C)CC(CC)OC2=O
C#CC12OCC1(O)C(CC)(CO)CC(CC)OC2=O
C#CC1=CC(C)(C)Nc2ccccc21
C#CC1CC(CO)C(CC)CC(O)(CC)C(=O)O1
C#CC1CCC(C(=O)O)CCO1
C#CC1CCCCC1C(C)Oc1ccccc1NC(=O)OCCCCCCCC
C#CC1CCCCC1CCC(=O)c1ccccc1CC(=O)OCCCCCCCC
C#CC1CCCCC1CCNC(=O)c1ccccc1C(=O)OCCCC(C)C
C#CC1CCCCC1CCOC(=O)c1ccccc1C(=O)OCCCC(C)C
C#CC1CCCCC1COC(=O)c1ccccc1C(=O)OCCCCCCCC
C#CC1CCCCC1COCC(O)c1ccccc1C(=O)OCCCCCCCC
C#CC1CCCCNC1=O
C#CC1COC(=O)O1
C#CC1COC(=O)OC(N)C1
C#CC1COc2ccccc2C1
C#CC1Cc2ccccc2CO1
C#CC1NC(=O)NC1=O
C#CC1NCCCNC1=O
C#CC1OC(CC)CC(CC)C(CO)C(O)CNC1=O
C#CC1OC2C(CO)C(CC)CC2(CC)OC1=O
C#CC1OC2OC(CO)C2(CC)CC(CC)OC1=O
C#CC1OCC(O)C(CC)(CO)CC(CC)OC1=O
C#CC=C(Cl)C=CNc1nnc(-c2ccc(OC)cc2)n1N
C#CC=C1C=C(COc2ccc3nc(N)sc3c2)S1
C#CC=CC(=O)OCCOCCOC(=O)CNC
C#CC=CC=CC(=O)OCCC(S)OCCOCCOC(=O)C(=C)C
C#CC=CC=CC(=O)c1ccc(OC(=O)C(=C)C)cc1
C#CC=CC=CC(=O)c1ccc(OC(=O)C(C)=O)cc1
C#CC=CC=CC(=O)c1ccc(OCCCCCCCC)cc1O
C#CC=CC=CC(C)CCCCCCC
C#CC=CC=CC=CC1=CC(=O)OC1=O
C#CC=CC=CCC(=O)c1ccc(OCCCCCCCC)c(=O)o1
C#CC=CC=CCCCC(=O)c1ccccc1OCCCN1CCCCC1=O
C#CC=CC=CCCCNc1cc(Cl)c(C)nc1-c1ccccn1
C#CC=CC=CCCCOCCc1ccccc1
C#CC=CC=CCCOCC1CNCC1CN(CC(C)C)S(=O)(=O)c1ccccc1
C#CC=CC=CCNCCN=Cc1ccccc1O
C#CC=CC=CCOC(=O)c1ccc(NC(=O)c2ccccc2)cc1
C#CC=CC=CCOC(=O)c1ccccc1
C#CC=CC=CCOCC(=O)NCCCN(CC(C)C)S(=O)(=O)c1ccccc1
C#CC=CC=CCOCC1CNCCC1CN(C(C)C)S(=O)(=O)c1ccccc1
C#CC=CC=CCOCC1CNCCC1N(CC(C)C)S(=O)(=O)c1ccccc1
C#CC=CC=CCS(=O)(=O)NCSc1cc(F)c(OCC(N)=O)c(F)c1
C#CC=CC=CNC(=O)c1ccc(OCCCOCCCC)cc1O
C#CC=CC=CNS(=O)(=O)NCCSc1cc(F)c(OCC(N)=O)c(F)c1
C#CC=CC=COC(=O)CCCCCCC
C#CC=CC=COC(=O)Cc1ccc(C(=O)Oc2ccccc2)cc1
C#CC=CC=COC(=O)Nc1ccc(C(=O)Oc2ccccc2)cc1
C#CC=CC=COC(=O)c1ccc(C(=O)Oc2ccccc2)cc1
C#CC=CC=COCC(=O)c1ccc(OC(=O)c2ccccc2)cc1
C#CC=CC=COCC1CCCN1CCCN(CC(C)C)S(=O)(=O)c1ccccc1
C#CC=CC=COCC1CNCCN1CCN(CC(C)C)S(=O)(=O)c1ccccc1
C#CC=CC=COc1cc(N)ccc1-c1ccc(N)cc1C(F)(F)F
C#CC=CC=CSCC(=O)c1ccccc1
C#CC=CCC(=O)OCCOCCOCCOCc1ccccc1
C#CC=CCCCC
C#CC=CCNC(=O)c1c[nH]cc1CN(CC(C)C)S(=O)(=O)c1ccccc1
C#CC=CN(F)c1ccc(NC(C)C)cc1
C#CC=CNC(=O)CCCCOCCCCC=C
C#CC=CNc1ccc(OCc2ccc(C#N)cc2)s1
C#CC=COC(=O)CCCCCCCCNC
C#CC=COCCOCCOCCO
C#CC=Cc1ccccc1
C#CC=Cc1ccccc1CCCOCC1=CC(=CC=C)C=C1
C#CCC#CCOCCCCCCCC
C#CCC(=O)C1CC2CCC1(C)C2(C)C
C#CCC(=O)C=CC1C(C)=CCCC1C(C)C
C#CCC(=O)CC(CC)CCC
C#CCC(=O)CCC(CC)CCC
C#CCC(=O)CCCCC
C#CCC(=O)COCCCC
C#CCC(=O)NC(O)C(=O)O
C#CCC(=O)NCCCCC
C#CCC(=O)NCCCOC(=O)CC(O)(O)CC(=O)OCCCC
C#CCC(=O)Nc1ccncc1
C#CCC(=O)OC(CC)CCCC
C#CCC(=O)OC=CCC=CCCCCCCCCCC
C#CCC(=O)OCC(CC)CCC
C#CCC(=O)OCC(CC)CNCC
C#CCC(=O)OCC(F)(F)C(F)(F)C(F)F
C#CCC(=O)OCC(F)(F)F
C#CCC(=O)OCCCCC
C#CCC(=O)OCCCCCC
C#CCC(=O)OCCCCCCC(C)C
C#CCC(C)(F)C(F)(F)F
C#CCC(CCC(=O)CCC#N)Oc1ccccc1C(=O)OCCCCCCCCC
C#CCC(F)(F)C(F)(F)F
C#CCC1(O)CC(CC)(CO)CC(CC)OC1=O
C#CCC1CCCC1N1CCCCCCN1
C#CCC1CCCCC1CCCC(=O)OCCCCCCCCCCCCCC(C)C
C#CCC1CCCCC1CCCCCC(=O)OCCCCCCC(=O)COCCCCCC
C#CCC1CCCCC1COCC(=O)OCCCCCCCCCCCCCCCCC
C#CCC1CCCCNC1=O
C#CCC1CCCNC1=O
C#CCC1COC(=O)O1
C#CCC=C(CC)CCOC(=O)CCCCCCCCCN(CC)CC(F)(F)F
C#CCCC(=O)C=CC1C(C)=CCCC1(C)C
C#CCCC(=O)C=CC1C(C)=CCCC1(F)C=C
C#CCCC(=O)C=CC1C(C)=CCCC1(F)F
C#CCCC(=O)C=CC1C(C)=CCCC1CC
C#CCCC(=O)C=CC1C(C)CCCC1(C)C
C#CCCC(=O)OCC(CC)CCC
C#CCCC(=O)OCCCCCCC
C#CCCC(=O)OCCCCCCCC
C#CCCC(=O)OCCOCCOC(=O)CSC
C#CCCC(C)CCCCCCCC
C#CCCC(CC(N)=O)C(N)=O
C#CCCC(CC)COC(=O)CCCCCCCCC1CCN1CC(C)(F)CC
C#CCCCC(=O)CCCCCCCC
C#CCCCC(=O)CN(C)CCCCC(=O)OCCCCC(C)C
C#CCCCC(=O)CN1CCCC(CC(=O)OCCCCCCCC)C1
C#CCCCC(C)CCCCCCCC
C#CCCCC(c1ccccc1C(=O)OCCCC(C)C)C(C)CC
C#CCCCC=C(C=CC(=O)OCCCCC=CCC)COCCC
C#CCCCCC(=O)CCCCCCC
C#CCCCCC(=O)N1CCCC(CC(=O)OCCCCCCCC)=C1C
C#CCCCCC(=O)N1CCCC(CC(=O)OCCCCCCCC)C1
C#CCCCCC(=O)N1CCCCC(C(=O)OCCCCCCCC)C1
C#CCCCCC(C)OC(=O)C=CC(=O)OCCCCC#CCC
C#CCCCCCC(=O)Cc1ccccc1C(=O)OCCCCCCCCC
C#CCCCCCC(=O)N(C)C=CC(=O)OCCCCCCCC
C#CCCCCCC(c1ccccc1C(=O)OCCCCCCC=CC)C(C)C
C#CCCCCCCC
C#CCCCCCCC(=O)CCCCC
C#CCCCCCCCC
C#CCCCCCCCC(=O)NCC=C
C#CCCCCCCCC(C)C
C#CCCCCCCCC(C)O
C#CCCCCCCCCC(=O)NC
C#CCCCCCCCCC(=O)Nc1c#cccc1
C#CCCCCCCCCC(=O)Nc1ccccc1
C#CCCCCCCCCC(=O)Nc1cccs1
C#CCCCCCCCCC=CC1CC(=O)OC1=O
C#CCCCCCCCCCC1OC(N)=Nc2ccccc21
C#CCCCCCCCCCCC(C)C
C#CCCCCCCCCCCCC
C#CCCCCCCCCCCCCC
C#CCCCCCCCCCCCCCC
C#CCCCCCCCCCN
C#CCCCCCCCCNC(C)C
C#CCCCCCCCCO
C#CCCCCCCCCOc1ccccc1NC(=O)OCCNC
C#CCCCCCCCCSC
C#CCCCCCCCN(CC)C(=O)Cc1ccccc1OCCCC(C)CCC
C#CCCCCCCCO
C#CCCCCCCCOC(=O)C=CC(=O)OCCCCCCCC
C#CCCCCCCCOC(=O)c1ccccc1C(=O)OCCCCC=CC=CC
C#CCCCCCCN(C)CCCCC(=O)CCC(=O)OCCCC(C)C
C#CCCCCCCOC(=O)C1CCCN1C(=O)CCCCC
C#CCCCCCCOC(=O)C=CC(=O)OCCCCCCCC
C#CCCCCCCOC(=O)CCCCC(=O)NCCOCCCCC
C#CCCCCCCOC(=O)CCCCC(=O)OCCCCCCCCO
C#CCCCCCCOC(=O)CCCCCOC(=O)CCCCCCC
C#CCCCCCCOCCCC
C#CCCCCCCOCCCCCCC
C#CCCCCCCOCCCCCCCC
C#CCCCCCOCCCCCCC
C#CCCCCCOCCCCCCCC
C#CCCCCNCCN(C)c1ccccc1N=CCC(=O)OCCCCCCCC
C#CCCCCOC1CCCCC1CCCC(=O)OCCCC
C#CCCCCOCCCCCCCCC
C#CCCCOCC(C)OC(=O)Cc1ccccc1OCCCCC(C)C
C#CCCCc1ccc(C(=O)OCCCCCCCOC)c(NC(C)COCC)c1
C#CCCN(CCCCC)CC(=C)C
C#CCCOC(=O)CC(O)(CCCCC)CC(=O)OCC1CCCO1
C#CCCOC(=O)CC=CCCCCCC(=O)OCCCC
C#CCCOC(=O)CCCCCCCCC(=O)NCCCC
C#CCCOC(=O)CCCCCCCCC(=O)OCC
C#CCCOC(=O)CCCCCCCCC(=O)OCCCC
C#CCCOC(=O)OCCCCCCC
C#CCCOCCC(=O)OCc1ccccc1OC(=O)OCCCCCCC
C#CCN(C)CC(CC)CCCC
C#CCN(CCO)C(=O)CC(C)O
C#CCN(CCO)C(=O)CCC#CCOCCCCCC
C#CCN(CCO)C(=O)c1ccncc1
C#CCN(CCO)c1ccccc1
C#CCN1C(=O)C(CCCCCCCCC)C1CO
C#CCN1C(=O)NC(C)(C)C1=O
C#CCN1CC(C)C(c2c[nH]c3c(N)ncnc23)C1
C#CCN1CC(c2c[nH]c3c(N)ncnc23)C(O)C1O
C#CCN1CC(c2n[nH]c3c(N)ncnc23)C(O)C1O
C#CCNC(=O)C(O)(CCC(C)(C)C)CC(=O)OCCCC
C#CCNC(=O)CCCCCCCC(=O)OC
C#CCNC(=O)Cc1ccccc1
C#CCNC(=O)c1cc(Nc2ccccc2)cs1
C#CCNC(=O)c1ccccc1
C#CCNC(=O)c1ccccc1C
C#CCNC(=O)c1ccccc1Cl
C#CCNC(=O)c1ccccc1N
C#CCNC(=O)c1ccccc1Nc1ccccc1
C#CCNC1CN(c2c[nH]c3c(N)ncnc23)C(C)C1O
C#CCNC=Nc1ccc(Nc2ccccc2)nc1
C#CCNCCCCOC(=O)CCCCC(=O)OCCCCC1CCCCC1
C#CCNS(=O)(=O)c1ccccc1
C#CCOC(=O)C(C)(C)COC(=O)C(C)C
C#CCOC(=O)C(CC(=O)OCCCC)(OC(C)=O)C1=CC(CC)=CCO1
C#CCOC(=O)C(CC)CCC
C#CCOC(=O)C(F)(F)F
C#CCOC(=O)C=CF
C#CCOC(=O)C=CNC
C#CCOC(=O)C=CSC
C#CCOC(=O)C=Cc1ccccc1
C#CCOC(=O)CC#N
C#CCOC(=O)CC(CC)CC
C#CCOC(=O)CC(CC)CCC
C#CCOC(=O)CCCCC(C)C
C#CCOC(=O)CCCCCCC(C)C
C#CCOC(=O)CCCCCCCC(=O)O
C#CCOC(=O)CCCCCCCC(=O)OC
C#CCOC(=O)CCCCCCCC(C)O
C#CCOC(=O)CCCCCCCCC(=O)OCC
C#CCOC(=O)CCCCCCCCN
C#CCOC(=O)CCCCCCCCO
C#CCOC(=O)CCCCCCCCOC
C#CCOC(=O)CCCCCCCCOC(=O)O
C#CCOC(=O)CCCCCCCCOC(C)C
C#CCOC(=O)CCCCCCCOC(=O)CO
C#CCOC(=O)CCCCCOC(=O)C1C=C1
C#CCOC(=O)CCOCCOCCOCCOCC
C#CCOC(=O)CN(CCCC)C(C)=O
C#CCOC(=O)COCCCCCC(=O)O
C#CCOC(=O)COCCOC(=O)C=CSC
C#CCOC(=O)COCCOCCOC(C)=O
C#CCOC(=O)CS
C#CCOC(=O)OCCCCOC(C)=O
C#CCOC(=O)c1cc[nH]c1
C#CCOC(=O)c1ccc[nH]1
C#CCOC(=O)c1cccs1
C#CCOC(=O)c1ccsc1
C#CCOC(=O)c1cn[nH]c1
C#CCOC(=O)c1cn[nH]c1C=C
C#CCOC(=O)c1cncs1
C#CCOC(=O)c1nccs1
C#CCOC(C)=Cc1ccccc1
C#CCOC(C)C=Cc1ccccc1
C#CCOC(C)CCCCCCCC(=O)O
C#CCOC(C)CCCCCCCCOC(=O)O
C#CCOC1=CC=C2C=CC3C(C)(C(=O)O)CCCC3(C)C2C1
C#CCOC=C1C=CC(NS(=O)(=O)c2ccsc2C(=O)O)C(O)=C1
C#CCOC=Nc1ccc(Nc2ccccc2)cc1
C#CCOCC#CCOC(=O)CCCCC(=O)OCCCCCCCC
C#CCOCC(=O)N(C)Sc1nc2ccccc2s1
C#CCOCC(=O)OCC(C)(C)C(OC(=O)C(C)C)C(C)C
C#CCOCC(=O)OCCCS(=O)(=O)O
C#CCOCC(C)CCCCCCC(=O)O
C#CCOCC(Sc1nc2ccccc2s1)C(N)=O
C#CCOCC1CCC(C(=O)O)CC1
C#CCOCC1CCCC(C(=O)O)N1
C#CCOCCC(=O)C1CCCCC1CCCC(=O)OCCCCCCCC
C#CCOCCC(=O)OC(=O)C=C(C)OCCCCCCCC
C#CCOCCC(=O)OC(=O)CCCC(C)OCCCCCCCC
C#CCOCCC(O)CSc1nc2ccccc2s1
C#CCOCCC(Sc1nc2ccccc2s1)C(N)=O
C#CCOCCCC(=CC=CNCOCCCCCCCC)C(C)C
C#CCOCCCC(=O)CCCCCC(=O)O
C#CCOCCCCC(=O)C(O)=CC=COCCCCCCCCC
C#CCOCCCCCCC(=O)C=CC(=O)OCCCCCCCC
C#CCOCCCCCCCC
C#CCOCCCCCCCCC
C#CCOCCCCCCCCCC
C#CCOCCCCCCCCCCC
C#CCOCCCCCCCCCCCC
C#CCOCCCCCCCCCCCCCOO
C#CCOCCCCCCCCCCCCO
C#CCOCCCCCCOCCCCC(=O)O
C#CCOCCCCCOC(=O)C=CC(=O)OCCCCCCCC
C#CCOCCCCCOC(=O)CCCC(=O)OCCCCCCCC
C#CCOCCCCCOCCCCCC(=O)O
C#CCOCCCCOC(=O)C=CC(=O)OCCC(C)CC
C#CCOCCCCOC(=O)CCCCC(=O)NCCCCCCO
C#CCOCCCCOC=Cc1c(C(=O)c2ccccc2)c1=O
C#CCOCCCOCC(=O)CCCCC(C)OCCCCCCOC
C#CCOCCCOCCCCCCCC
C#CCOCCN(CCC#N)CCCCCC(=O)OCCCCCCCC
C#CCOCCNCC(O)(CC(=O)OCC)CC(=O)OCCCC
C#CCOCCOCCCCCCCC
C#CCOCCOCCCCCCCCC
C#CCOCc1ccc(=O)[nH]c1
C#CCOCc1ccc2nc[nH]c2c1
C#CCOc1cc(O)c(C(N)=O)cc1O
C#CCOc1cc(OCC#N)nc(OCC=C)n1
C#CCOc1cc2ccccc2cc1N
C#CCOc1cc2ccccc2cn1
C#CCOc1ccc(=O)[nH]c1
C#CCOc1ccc(N(C)O)c2ccccc12
C#CCOc1ccc(NS(=O)(=O)c2ccc(F)cc2O)c(O)c1
C#CCOc1ccc(NS(=O)(=O)c2ccsc2C(=O)O)c(O)n1
C#CCOc1ccc2cccc(Br)c2n1
C#CCOc1ccc2nc[nH]c2c1
C#CCOc1ccc2nc[nH]c2c1C(N)=O
C#CCOc1nc(OCC=C)nc(OCC#N)c1F
C#CCOc1nc(OCC=C)nc(OCC=C)n1
C#CCSc1ccccc1
C#CCc1cccc(Br)c1O
C#CCc1cccc(C)c1O
C#CCc1cccc(C)c1OC
C#CCc1cccc(C)c1ON
C#CCc1ccccc1
C#CCn1c2c(c3ccccc31)-c1c(c(=O)c1=O)C2=O
C#CCn1cc(-c2c[nH]c3c(N)ncnc23)c(O)c1O
C#CN=C(N)C=Cc1ccccc(C(=COC)C(=O)OC)cccc1
C#CN=CC=CCNc1c(O)ccc2c1ccc1ccccc12
C#CNCC(=O)NCC(CC)CCCC
C#CNc1ccccc1NC(=O)c1ccccn1
C#COC1C(OCC2=CC(C)C=CCS2)=CC(O)(C(=O)O)CC1O
C#COCC(O)S(=O)c1ccccc1C
C#CONC(N)CCCCC
C#Cc1c(C)c(S(N)(=O)=O)cc(O)c1N
C#Cc1c(C)cc(C)n1CCO
C#Cc1c[nH]nc1C(=O)c1ccc2ccccc2c1
C#Cc1cc(C)c(N)c(F)c1N
C#Cc1cc(CO)c(CO)c(OC)c1
C#Cc1cc(COc2ccc3nc(N)sc3c2)ccn1
C#Cc1cc(Sc2ccccn2)c(C)o1
C#Cc1cc(Sc2nc3ccccc3[nH]2)cn1OC
C#Cc1cc2ccccc2cc1O
C#Cc1cc2ccccc2cn1
C#Cc1ccc(-c2ncc(-c3ccc(OC)cc3)nn2)nc1
C#Cc1ccc(-c2nccs2)cc1
C#Cc1ccc(C(=O)Nc2cc3ccccc3o2)nc1
C#Cc1ccc(C(=O)Oc2cccc(N)c2)cc1C(=O)OC1C=CNC1
C#Cc1ccc(Cl)cc1
C#Cc1ccc2c(=O)c3ccccc3oc2c1
C#Cc1ccc2c(C(N)=O)c1-c1ccccc1C2=O
C#Cc1ccc2c(c1)COC2
C#Cc1ccc2c(c1)NCC2
C#Cc1ccc2c(c1)NCO2
C#Cc1ccc2c(c1)OCC2
C#Cc1ccc2ccccc2c1
C#Cc1cccc(-c2nc[nH]n2)c1
C#Cc1cccc(-c2nnco2)c1
C#Cc1cccc(-n2cccn2)c1
C#Cc1cccc(-n2ccnc2)c1
C#Cc1cccc(-n2cnnc2)c1
C#Cc1cccc(=O)[nH]1
C#Cc1cccc(=O)n1C
C#Cc1cccc(=O)n1N
C#Cc1cccc(C(=O)N2CCC2)c1
C#Cc1cccc(C(=O)NC(C)C)c1
C#Cc1cccc(C(=O)NCCCC)c1
C#Cc1cccc(C(=O)c2nccs2)c1
C#Cc1cccc(C(N)=O)c1
C#Cc1cccc(C)c1CO
C#Cc1cccc(C)c1O
C#Cc1cccc(C)n1
C#Cc1cccc(CC#N)c1
C#Cc1cccc(CC)c1O
C#Cc1cccc(COC)c1
C#Cc1cccc(COC)c1N
C#Cc1cccc(Cl)c1
C#Cc1cccc(Cl)c1Cl
C#Cc1cccc(N(C)O)c1
C#Cc1cccc(N)c1Br
C#Cc1cccc(N)c1C
C#Cc1cccc(N)c1C#N
C#Cc1cccc(N)c1C(=O)NC
C#Cc1cccc(N)c1C(C)=O
C#Cc1cccc(N)c1C=C
C#Cc1cccc(N)c1C=CCl
C#Cc1cccc(N)c1C=NC
C#Cc1cccc(N)c1CC#N
C#Cc1cccc(N)c1Cl
C#Cc1cccc(N)c1F
C#Cc1cccc(N)c1N
C#Cc1cccc(N)c1NC
C#Cc1cccc(N)c1OC
C#Cc1cccc(N)c1S
C#Cc1cccc(N)c1SC
C#Cc1cccc(N)n1
C#Cc1cccc(NC(=O)C(C)C)c1
C#Cc1cccc(NC(=O)C(F)F)c1
C#Cc1cccc(NC(=O)CCCC)c1
C#Cc1cccc(NC(=O)NCCCC)c1
C#Cc1cccc(NC)c1
C#Cc1cccc(NC2C=NC=CC2C)c1
C#Cc1cccc(NCc2ccccn2)c1
C#Cc1cccc(NCc2cccnc2)c1
C#Cc1cccc(NCc2nccn2C)c1
C#Cc1cccc(Nc2ccccc2C)c1
C#Cc1cccc(Nc2ncccc2N)c1
C#Cc1cccc(O)c1
C#Cc1cccc(O)c1N
C#Cc1cccc(OC)c1
C#Cc1cccc(S(=O)(=O)c2cccc(=O)[nH]2)c1
C#Cc1cccc2c1C(=O)c1c-2cccc1S(N)(=O)=O
C#Cc1cccc2ccccc12
C#Cc1ccccc1
C#Cc1ccccc1C(=O)c1ccccc1Cl
C#Cc1ccccc1NCCN=Cc1ccccc1O
C#Cc1ccccc1S(=O)(=O)O
C#Cc1ccccc1S(=O)(=O)OC
C#Cc1ccccn1
C#Cc1cccs1
C#Cc1ccncc1-c1ccncc1
C#Cc1ccncc1-c1ccncn1
C#Cc1ccncc1C#N
C#Cc1ccncc1Cl
C#Cc1ccncc1F
C#Cc1nc(N)cc(C)c1Sc1nc2ccccc2[nH]1
C#Cn1c(-c2ccccc2)nnc1-c1ccccc1Oc1ccccc1
C(#CC1=CCC=C1)COCc1ccccc1
C(#Cc1ccccc1)CCOc1ccccc1
C(#Cc1ccccc1)COCc1ccccc1
C(#Cc1ncc[nH]1)CCc1ncc[nH]1
C(=C(c1ccccc1)c1cccs1)c1ccccn1
C(=C1CCCCC1)C1CCCCC1
C(=C1N=C(c2ccccn2)N=C(c2ccccc2)N1)c1ccco1
C(=C1N=c2ccccc2=C1c1ccccc1)c1ccccc1
C(=C1Nc2ccccc2N1)c1ccccc1
C(=C1Nc2ccccc2S1)c1ccccc1
C(=C1Oc2ccccc2S1)c1ccccc1
C(=C1SNNc2ccccc21)c1ccccc1
C(=COc1cccc2c1C=C2)N=Cc1ccccc1
C(=COc1ccccc1)N=Cc1ccccc1
C(=Cc1cc[nH]c1)COCc1ccccc1
C(=Cc1ccc2ccccc2c1)NC1=NN(c2ccc[nH]2)C1
C(=Cc1ccccc1)C(=Nc1ccccn1)c1ccccc1
C(=Cc1ccccc1)CN1C=Cc2ccccc2C1
C(=Cc1ccccc1)CNN1C=Cc2ccccc2C1
C(=Cc1ccccc1)COC1C=Cc2ccccc2C1
C(=Cc1ccccc1)Nc1cc[nH]c1
C(=Cc1ccccc1)Oc1ccccn1
C(=Cc1ccno1)N=Cc1ccccc1-c1nc2ccccc2o1
C(=Cc1noc2c1=COCC=2)c1ccccc1
C(=NC1Sc2ccccc21)Sc1nc2ccccc2s1
C(=NCSc1ccccc1)Sc1nc2ccccc2s1
C(COc1ccccc1)=NCc1ccccc1
C(COc1ccccc1)=NCc1cccnc1
C(Oc1ccccc1)=C1Cc2ccccc2N1
C1#Cc2c[nH]c(-c3scc4c3OCCO4)c2OC1
C1=C(C2=C(c3ccccc3)c3ccccc32)SCN1
C1=C(C=c2nnc(=Cc3ccccn3)s2)CC1=Nc1ccccn1
C1=C(CC2CCCCC2)CCCC1
C1=C(CCCOCc2ccccc2)SC2=CC2=C1
C1=C(NCCCCc2ncc[nH]2)CC1
C1=C(NCCc2cccs2)N=C(c2ccccn2)N=C2CN=C12
C1=C(Nc2ccccc2)N=c2ccccc2=CN1
C1=C(Oc2ccnc3ccccc23)CCCN1
C1=C(SCc2ccccc2)OCC=C1c1ccccc1
C1=C(Sc2cccs2)C=C2CON=C12
C1=C(Sc2nncs2)C=C2CC=C2OCOC1
C1=C(Sc2nncs2)C=C2OCC=C12
C1=C(Sc2nncs2)C=C2OCC=C2OC1
C1=C(c2c[nH]c3ccccc23)CNCC1
C1=C(c2c[nH]c3ccccc23)NCOC1
C1=C(c2c[nH]cn2)NC(c2ccn[nH]2)=NC1
C1=C(c2ccccc2)C(SCc2ccccc2)OC1
C1=C(c2ccccc2)C(c2ccccc2)Nc2ccccc21
C1=C(c2ccccc2)C(c2ccccc2)Oc2ccccc21
C1=C(c2ccccc2)COCC1
C1=C(c2ccccc2)N(c2ccccc2)N=C(c2ccccc2)O1
C1=C(c2ccccc2)N(c2ccccc2)NC(c2ccccc2)=N1
C1=C(c2ccccc2)N=C(c2ccccc2)NN1c1ccccc1
C1=C(c2ccccc2)NN(c2ccccc2)N1
C1=C(c2ccccc2)Nc2ccccc2C1c1ccccc1
C1=C(c2ccccc2)Oc2ccccc2C1c1ccccc1
C1=C(c2ccccc2)Oc2ccccc2C=C1c1cccs1
C1=C(c2ccccc2)[SH](c2ccccc2)N=C(c2ccccc2)O1
C1=C(c2ccccc2)c2ccccc2NC1c1ccccc1
C1=C(c2ccccc2)c2ccccc2OC1c1ccccc1
C1=C(c2ccccn2)C(=NC2CC2c2nc3ccccc3o2)CN1
C1=C(c2ccccn2)C(c2ccccc2)=NC(c2ccccc2)O1
C1=C(c2ccccn2)C(c2ccccc2)NC(c2ccccn2)=N1
C1=C(c2ccccn2)N(c2ccccc2)NC(c2ccccc2)=N1
C1=C(c2ccccn2)NC(c2ccccn2)=NN1
C1=C(c2ccccn2)NCC(c2ccccn2)=N1
C1=C(c2ccccn2)NNC(c2ccccc2)=N1
C1=C(c2ccccn2)NNC(c2ccccn2)=N1
C1=C(c2ccccn2)c2ccccc2SC1c1ccccc1
C1=C(c2cccs2)CC(c2ccccc2)=N1
C1=C(c2ccn[nH]2)N(c2ncccn2)CC1
C1=C(c2ccn[nH]2)N=C(c2ccn[nH]2)NC1
C1=C(c2ccn[nH]2)NC(c2ccco2)=CC1
C1=C(c2ccn[nH]2)NC(c2ccn[nH]2)=CC1
C1=C(c2ccn[nH]2)NC(c2ccn[nH]2)=NC1
C1=C(c2ccn[nH]2)NC(c2ccno2)=CC1
C1=C(c2ccncc2)CC=C(n2cccn2)O1
C1=C(c2nc3ccccc3o2)C(c2nc3ccccc3o2)=CNC1
C1=C(c2nnc(-c3ccccn3)cc2-c2ccccn2)COCC1
C1=C(c2nnc(-c3ccccn3)nc2-c2ccccn2)COCC1
C1=C(c2nnc(-c3ccccn3)nc2-c2ccccn2)OCCC1
C1=C(c2scc3c2OCCO3)C2=C(C1)OCCO2
C1=C(n2cccn2)SC(n2cccn2)=CC1
C1=C(n2cccn2)SC(n2cccn2)=CN1
C1=C2C(CC3CCCCCC23)N1
C1=C2C=C(Sc3cccs3)C(=CC1)COC2
C1=C2C=C(c3ncc[nH]3)NCC2=C1
C1=C2C=C1c1ccccc1ON=N2
C1=C2C=C2NC(c2ncc[nH]2)=C1
C1=C2C=C2Oc2ccc3cccnc3c21
C1=C2C=C2SC(C2CCc3ccccc32)=C1
C1=C2C=C2c2c(ccc3cccnc23)O1
C1=C2C=c3c(ccc4ccccc34)=c3c(cccc3=N2)O1
C1=C2CC3CCCCC3C(C2)N1
C1=C2CC=C2NC(c2ncc[nH]2)=C1
C1=C2CC=C2Oc2ccccc21
C1=C2CCCC3CCC2CC1C3
C1=C2CCCCCC3CC1CC23
C1=C2CCN2Oc2ccccc21
C1=C2CNN2Oc2ccccc21
C1=C2N=C(C=C2Sc2cccs2)CC1
C1=C2N=CC=C(c3cc[nH]c3-c3cccs3)SC=12
C1=C2NC3C(C1)CCCCCC23
C1=C2NCC2CC2CCCCC12
C1=C2NCC3CCC(CCC1)CC23
C1=C2OC=C2C(Sc2ncccn2)=C1
C1=C2OCC=C(Sc3ncccn3)C2=COC1
C1=C2OCCC=C2C(Sc2ncc[nH]2)=C1
C1=C2OCCOc3c2csc3C2NC=C2OCCO1
C1=C2OCN=C2CC=C1c1scc2c1OCCO2
C1=C2ON=C(CCc3ccccc3)N2C1
C1=C2SC1=NC(c1nc3ccccc3s1)S2
C1=C2c3ccccc3OCN12
C1=C2c3ccccc3ON2C1
C1=C2c3ccncc3NN=C(c3ccccn3)NN12
C1=C=Cc2ccccc2ONC=NC=1
C1=CC(=C2C=NN(c3ccccn3)C(c3ccccn3)=N2)N=CC1
C1=CC(=C2N=CN(c3ccccn3)C(c3ccccn3)=N2)N=CC1
C1=CC(=CC2=Cc3cccc2c3)N=NC(c2ccccc2)=C1
C1=CC(C2=Cc3ccccc32)=NOC1
C1=CC(C2=NOC(c3ccccc3)=C(c3ccccc3)O2)=CSC1
C1=CC(C2CCNCC2)=CN=C2C=C12
C1=CC(C2CCNCC2)=CN=C2OCCC=C12
C1=CC(C2CCc3ccccc32)=CC=NC1
C1=CC(C2CCc3ccccc32)=CNC1
C1=CC(C2CCc3ccccc32)=CSN1
C1=CC(C2N=C(c3ccccc3)OC=C2c2ccccc2)=CNC1
C1=CC(CC2CCCCC2)=CCC1
C1=CC(CCCCc2ccccc2)c2ccccc21
C1=CC(CCOCCc2ccccc2)C=NC1
C1=CC(Cc2cc[nH]c2-c2cccs2)=C1
C1=CC(Cc2ccc3ncccc3n2)C=CS1
C1=CC(Cc2cn[nH]c2-c2cccs2)=CC1
C1=CC(Cn2cc3cc2-3)CC(c2nc3ccccc3o2)=C1
C1=CC(Nc2cc(-c3cccnc3)nc3ccccc23)C=C1
C1=CC(OCCc2ccccc2)c2ccccc21
C1=CC(Oc2cc(-c3ccccn3)nc3ccccc23)C=C1
C1=CC(Oc2cccc3ncccc23)=CC1
C1=CC(Oc2cccc3ncccc23)C=C1
C1=CC(Oc2ccccccncc2)=CC1
C1=CC(Oc2ccnc3ccccc23)=C1
C1=CC(Oc2ccnc3ccccc23)=CC1
C1=CC(Oc2ccnc3ccccc23)=CNC1
C1=CC(Oc2ccnc3ccccc23)=COC1
C1=CC(Oc2ccnc3ccccc23)=CSC1
C1=CC(Oc2nccc3ncccc23)=C1
C1=CC(Sc2ccccc2)=C1
C1=CC(c2[nH]ccc2-c2cccs2)C=C1
C1=CC(c2cc(-c3ccccc3)c3ccccc3n2)=CNC1
C1=CC(c2cc3c(-c4ccccc4)ccccc-3n2)=CNC1
C1=CC(c2cc3ncccc3[nH]2)CC(c2nc3ccccc3o2)=C1
C1=CC(c2cccc(-c3ccn[nH]3)n2)ON1
C1=CC(c2ccccc2)C=c2cc[nH]c2=C1
C1=CC(c2ccccc2)c2c[nH]nc21
C1=CC(c2ccccn2)=C(c2cccs2)OO1
C1=CC(c2ccccn2)=CNC(c2nc3ccccc3s2)=C1
C1=CC(c2ccco2)Oc2ccc3cccnc3c21
C1=CC(c2ccn[nH]2)=NC(c2cc[nH]c2)=NN1
C1=CC(c2ccn[nH]2)=NC(c2ccn[nH]2)=CC1
C1=CC(c2ccn[nH]2)=NC(c2ccn[nH]2)=NN=C1
C1=CC(c2ccn[nH]2)=Nc2ncccc2N1
C1=CC(c2ccn[nH]2)=Nc2occc2N1
C1=CC(c2ccn[nH]2)N=C1c1ccn[nH]1
C1=CC(c2ccnc(-c3ccn[nH]3)n2)ON1
C1=CC(c2cnc3ccccc3c2)=CSN1
C1=CC(c2cnc3ccccc3n2)=CNC1
C1=CC(c2cnc3ccccc3n2)=CSC1
C1=CC(c2n[nH]c(-c3ccccc3)n2)=CCN1
C1=CC(c2n[nH]c(-c3ccccc3)n2)=CNC1
C1=CC(c2n[nH]c(-c3ccccn3)n2)=CCN1
C1=CC(c2nc(-c3ccccc3)c3ccccc3n2)=CNC1
C1=CC(c2nc(-c3ccccc3)nc(-c3ccccc3)n2)=CNC1
C1=CC(c2nc(-c3ccccc3)nc(-c3ccccc3)n2)=CSC1
C1=CC(c2nc(-c3ccccc3)nc(-c3cccnc3)n2)=CSC1
C1=CC(c2nc(-c3ccccc3)no2)=CNC1
C1=CC(c2nc(Cc3ccc[nH]3)nc(-c3ccccc3)n2)=CNC1
C1=CC(c2nc3ccccc3o2)C(c2nc3ncccc3o2)=NC1
C1=CC(c2nc3ccccc3o2)CC(c2ccccc2)=NC1
C1=CC(c2nc3ccccc3o2)OC(c2nc3ccccc3o2)=C1
C1=CC(c2nc3ccccc3s2)=NOC1
C1=CC(c2nc3ccccc3s2)N=CC1
C1=CC(c2nc3ccccc3s2)N=CN1
C1=CC(c2nc3ccccc3s2)NCC1
C1=CC(c2ncc[nH]2)=CC1
C1=CC(c2ncc[nH]2)=CC=C2C=C12
C1=CC(c2ncc[nH]2)=CNC1
C1=CC(c2nn[nH]n2)=CCCO1
C1=CC(c2nn[nH]n2)=CCO1
C1=CC(c2nnc(-c3ccccn3)c(-c3ccccn3)n2)N=CC1
C1=CC(c2nnc(-c3ccccn3)c(-c3ccccn3)n2)N=CN1
C1=CC(c2nnc(-c3ccccn3)c(Cc3ccco3)n2)=C1
C1=CC(n2cccn2)=C(n2cccn2)C=1
C1=CC(n2cccn2)=NN(Nc2cccnc2)C1
C1=CC(n2cccn2)=NN(c2nccs2)C=1
C1=CC(n2ccnn2)C(n2cccn2)=NC1
C1=CC(n2nccc2Oc2ccccc2)C=C1
C1=CC2=C(C1)CC(c1ccccc1)=Cc1ccccc1N2
C1=CC2=C(C1)OCCO2
C1=CC2=C(CNc3cccnc32)OC1
C1=CC2=C(CSc3cccnc32)OC1
C1=CC2=C(NC(c3nc4ccccc4s3)=C1)OCC2
C1=CC2=C(c3ccccc3)N=CC(c3ccccc3)N2C=C1
C1=CC2=C(c3ccccc3)NC=C(c3ccccc3)N2C=C1
C1=CC2=CC(=CC1)N=c1ccccc1=CC2c1ccccc1
C1=CC2=CC(CCOCCc3ccccc3)=CC2=C1
C1=CC2=CC(c3ccccc3)=C(C=NOc3ccccc3N2)C1
C1=CC2=CC=C(c3cc[nH]c3-c3cccs3)[SH]2C=1
C1=CC2=CN=C(c3cc[nH]c3-c3cccs3)[SH]2C=1
C1=CC2=CN=C(c3ccccn3)C2C=C1
C1=CC2=NC=C(C3CCNCC3)C2=C1
C1=CC2=NC=C(c3ccccc3)CN2C=C1
C1=CC2=NCN=C(c3ccccn3)C2S1
C1=CC2=c3c(C4CCNCC4)c[nH]c3=CC2S1
C1=CC2CC1CC1CCCCC21
C1=CC2CCCCC(CN1)C2
C1=CC2CCCCC2CCCN1
C1=CC2CCCCC2CCN1
C1=CC2CCCCC2CCNC1
C1=CC2CCCCCC2CC1
C1=CC2CCCCCC2CCN1
C1=CC2CCCCCCC2CC1
C1=CC2N=C(c3ccccn3)SC2C=C1
C1=CC2N=CON2c2ccccc21
C1=CC2N=c3[nH]cc(C4CCNCC4)c3=CC2=C1
C1=CC2NOc3ccccc3C=C12
C1=CC2OCC2C=C1c1scc2c1OCCO2
C1=CC2SC(NSc3nc4ccccc4s3)=NC2=C1
C1=CC2Sc3ccccc3C=C2OC(c2nc3ccccc3o2)=C1
C1=CC=C(c2ccccc2)N=CC(c2ccccc2)NC=C1
C1=CC=C(c2ccccn2)CN=C1
C1=CC=C(c2ccncn2)NC=1
C1=CC=C(c2cnc3ccccc3n2)C=1
C1=CC=C(c2n[nH]c(-c3ccccc3)n2)C=1
C1=CC=C(c2nc3ccccc3o2)CC(c2ccccn2)=C1
C1=CC=C(c2nc3ccccc3o2)CC(c2ccccn2)OC=C1
C1=CC=C(c2nc3ccccc3o2)CC=1c1nc2ccccc2[nH]1
C1=CC=C(c2nc3ccccc3o2)OC=1c1cc2ccccn2n1
C1=CC=C(c2nc3ccccc3o2)OC=1c1n[nH]c2ccccc12
C1=CC=C(c2ncc[nH]2)NN=1
C1=CC=CC(c2nc3ccccc3[nH]2)C=1c1cc2ccccc2o1
C1=CC=CC=1C#CCCCc1ccccc1
C1=CC=CC=1C#CCCOCc1ccccc1
C1=CC=CC=1C1CCc2ccccc21
C1=CC=CC=1c1cnc2ccccc2n1
C1=CC=CN=c2ccccc2=C(c2ccccc2)C=CC=C1
C1=CC=CNC=1c1cnc2ccccc2n1
C1=CC=CNC=1c1nc2ccccc2s1
C1=CC=COC=1c1cnc2ccccc2n1
C1=CC=NC(c2nc3ccccc3s2)C=1
C1=CC=NC=1c1ccc2ncccc2n1
C1=CC=NC=1c1cnc2ccccc2n1
C1=CC=NC=1c1nc2ccccc2s1
C1=CC=NC=C2C=C(C=NC=C1)C(c1nc3ccccc3o1)=C2
C1=CC=NN=C(C2C=CC=C2c2nc3ccccc3o2)COC=C1
C1=CC=NONc2ccccc2C=C1
C1=CC=c2c(C3CCNCC3)c[nH]c2=NC=1
C1=CC=c2nc(CCCCc3ncc[nH]3)[nH]c2=1
C1=CC=c2nc(CNCCc3ncc[nH]3)[nH]c2=1
C1=CC=c2scnc2=CC(c2ccccn2)=C1
C1=CCC(CCOCCc2ccccc2)=C1
C1=CCC(Sc2nnc(-c3ccncc3)c(-c3ccccn3)n2)=C1
C1=CCC(c2cc3cccnc3o2)=C1
C1=CCC(c2ccn[nH]2)C(c2ccn[nH]2)C1
C1=CCC(c2nnc(-c3ccncc3)c(-c3ccccn3)n2)=C1
C1=CCC2CCCCC2CC1
C1=CCC2CCCCCC2CC1
C1=CCC=CC(C2CCc3ccccc32)=C1
C1=CCC=CC(COCCCc2ccccc2)=C1
C1=CCCC(C2CCc3ccccc32)=C1
C1=CCCC(c2cnc3ccccc3n2)=C1
C1=CCCC2CCCCC2C=C1
C1=CCCCc2ccccc2C=C1
C1=CCCNC(c2ccncn2)=C1
C1=CCN=CC(CCOCCc2ccccc2)=C1
C1=CCNC(c2nnc(-c3ccncc3)c(-c3ccccn3)n2)=C1
C1=CCOC(c2ccccc2)C=C(c2ccccc2)NC=C1
C1=CCOC(c2ccccc2-n2cc3ccccc3n2)=NOC=C1
C1=CCSC(c2cnc3ccccc3n2)=C1
C1=CCc2cccc(c2)C(c2ccccc2)=NNCN=C1
C1=CN(Cc2c[nH]c3ccccc23)CN1
C1=CN(c2cccc(-n3cccn3)n2)CO1
C1=CN(c2ccccc2)Oc2ccccc21
C1=CN(c2ccccn2)Oc2ccccc21
C1=CN(c2cccnc2)Oc2ccccc21
C1=CN(c2cccs2)C(=Cc2sccc2-c2cccs2)c2[nH]ccc21
C1=CN(c2cccs2)Oc2ccccc21
C1=CN(c2cnccn2)Oc2ccccc21
C1=CN(c2cncs2)Oc2ccccc21
C1=CN(c2nccs2)Oc2ccccc21
C1=CN2CCN(C3CCCCC3)CC2CC1
C1=CN2Oc3ccccc3C=C2C1
C1=CN=C(C(=CNc2ccccn2)N=Cc2ccc(-c3ccccc3)cc2)C1
C1=CN=C(CCCCc2ncc[nH]2)NC=C1
C1=CN=C(CCCNCc2ncc[nH]2)NC=C1
C1=CN=C(CCOCCc2ccccc2)SC=1
C1=CN=C(Nc2ccccc2)C1
C1=CN=C(c2ccccc2)C1
C1=CN=C(c2ccccc2)OC(c2nc3cccnc3o2)=C1
C1=CN=C2NC=C(C3CCNCC3)C=C2C=C1
C1=CN=CC(Nc2ccccc2)=NC=C1
C1=CN=CC(c2nn[nH]n2)=NC1
C1=CN=CONc2ccccc2C=C1
C1=CN=COc2ccccc2C=1
C1=CN=COc2ccccc2C=CC1
C1=CNC(CCCCc2ncc[nH]2)N1
C1=CNC(c2nc3ccccc3s2)=CN1
C1=CNC=C(c2nn[nH]n2)C=N1
C1=CNC=CC(C2CCc3ccccc32)=C1
C1=CNC=CC(c2n[nH]c(-c3ccccc3)n2)=C1
C1=CNC=NC=1c1nc2ccccc2s1
C1=CNCC(c2c[nH]c3ccccc23)C1
C1=CNCC(c2nnc(-c3ccccn3)c(-c3ccccn3)n2)=C1
C1=CNCCC2CCCCC2C1
C1=CNN=C(c2ccncc2)OC1
C1=CNN=NNc2nnnn2NC1
C1=CNONc2ccccc2C1
C1=CNc2cccnc2CC(c2nc3ccccc3o2)=C1
C1=COC(CSc2nc3ccccc3[nH]2)=CCO1
C1=COC(CSc2nc3ccccc3s2)=CCO1
C1=COC(Nc2ccccn2)=C(n2ccc3ccccc32)C=C1
C1=COC(Nc2ccccn2)=CC(n2ccc3ccccc32)=C1
C1=COC(c2ccccc2)=CN=C1
C1=COC2=NC=C(C3CCNCC3)C=CC2=C1
C1=COC2=NOCC(=CC1)C(Sc1nc3ccccc3[nH]1)=C2
C1=COC=c2cc3nccnc3nc2=1
C1=COCCC=C(c2nn[nH]n2)C=1
C1=COCNc2ccccc2C=C1
C1=COCOc2ccccc2C=C1
C1=CON(c2ccccn2)N=CC=c2ccc3ccccc3c2=C1
C1=CON(c2nccc(-n3cccn3)n2)C1
C1=CONc2ccccc2C=CC1
C1=COc2c(cccc2Oc2ccccc2)CCC1
C1=COc2ccccc2CC(c2ccccc2)=NN1
C1=CS2=C1N=C(c1ccncc1)NC2
C1=CSC(CCOCCc2ccccc2)=CC1
C1=CSC(c2cc[nH]c2-c2ccc[nH]2)=CC=N1
C1=CSC(c2ncc[nH]2)=CC1
C1=CSC(c2ncc[nH]2)=NN=C1
C1=CSC=C(c2cnc3ccccc3c2)C=1
C1=CSCC=NC(c2ccccc2)=NC1
C1=C[SH](c2cccc(-n3cccn3)n2)N=C1
C1=C[SH]2C(=CC=C2c2cc[nH]c2-c2cccs2)N=C1
C1=C[SH]2C(=CC=C2c2cc[nH]c2-c2cccs2)S1
C1=C[SH]2C1=CC=C2c1cc[nH]c1-c1cccs1
C1=Cc2c(ccc3ccccc23)OC1
C1=Cc2c(ccc3cccnc23)C1
C1=Cc2c(ccc3cccnc23)NC1
C1=Cc2c(ccc3ccncc23)CS1
C1=Cc2c(ccc3cnccc23)OC1
C1=Cc2c(ccc3cncnc23)OC1
C1=Cc2c(cnc3cccnc23)OC1
C1=Cc2c1cccc2-c1ccncn1
C1=Cc2c1cccc2-c1cnc2ccccc2c1
C1=Cc2c1cccc2-c1nc2ccccc2[nH]1
C1=Cc2c1cccc2C1CCc2ccccc21
C1=Cc2c1cccc2CCOCCc1ccccc1
C1=Cc2c1cccc2Oc1ccnc2ccccc12
C1=Cc2c1cnc1nccnc21
C1=Cc2cc(-c3nn[nH]n3)ncc21
C1=Cc2cc(cc3ccc4ccccc4c23)O1
C1=Cc2ccc(cc2)C=NNC(c2ccccc2)=N1
C1=Cc2cccc3c2NOC1=C3
C1=Cc2ccccc2C(c2ccccc2)=NC(c2ccccc2)=N1
C1=Cc2ccccc2CC=1CCCc1ccccc1
C1=Cc2ccccc2N2OC=NC2=C1
C1=Cc2ccccc2N2OC=NC=C12
C1=Cc2ccccc2N=1
C1=Cc2ccccc2N=C(CCCCc2ncc[nH]2)N1
C1=Cc2ccccc2NCC(c2nc3ccccc3o2)=C1
C1=Cc2ccccc2NO1
C1=Cc2ccccc2NOC1
C1=Cc2ccccc2NOC=NC1
C1=Cc2ccccc2NON=CC1
C1=Cc2ccccc2NONC1
C1=Cc2ccccc2OC1
C1=Cc2ccccc2OC=N1
C1=Cc2ccccc2OC=NC1
C1=Cc2ccccc2OC=NCC1
C1=Cc2ccccc2OCNC1
C1=Cc2ccccc2OCNCC1
C1=Cc2ccccc2OCOC1
C1=Cc2ccccc2ONC1
C1=Cc2ccccc2ONCOC1
C1=Cc2ccccc2Oc2nccnc2C1
C1=Cc2ccccc2[SH](c2nc3ccccc3s2)C=N1
C1=Cc2cccnc2-c2ccccc2O1
C1=Cc2cccnc2C2=CC1=COC2
C1=Cc2cccnc2C2=CCOC1=C2
C1=Cc2cccnc2C2=COCC1=C2
C1=Cc2cccnc2Cc2ccccc21
C1=Cc2cccnc2N=c2nccnc2=N1
C1=Cc2cccnc2Oc2ccccc21
C1=Cc2cn[nH]c(-c3ccccc3)n[nH]c2NC1
C1=Cc2cnc3ccccc3c2OC1
C1=Cc2cncccnccc2OC1
C1=Cc2cncn2Oc2ccccc21
C1=Cc2cnnn2Oc2ccccc21
C1=Cc2n[nH]nc2-c2ccccc2C1
C1=Cc2nc(-c3ncc[nH]3)ccc21
C1=Cc2nc3nccnc3cc21
C1=Cc2occc2Cc2ncccc21
C1=Cc2sc(Sc3nnc4ccccc4n3)nc2C1
C1=Cn2cnc(-c3ncc[nH]3)c21
C1=Cn2nnnc2NC1
C1=NC(C2N=C(c3ccccc3)OC(c3ccccn3)=N2)=CNC1
C1=NC(C=C2C=C(c3ccccc3)c3ccccc32)=CC1
C1=NC(CCCCc2ncc[nH]2)NC1
C1=NC(c2ccccc2)=CSN1
C1=NC(c2ccccc2)=NC(C2CCC2)=Nc2ccccc21
C1=NC(c2ccccc2)=NC(c2ccccc2)N1c1ccccc1
C1=NC(c2ccccc2)=NC2=CC(=C1)c1ccccc1N2
C1=NC(c2ccccc2)=N[SH]1c1ccccc1
C1=NC(c2ccccn2)=NC(N2CCCc3ccccc32)=NC1
C1=NC(c2ccccn2)=NC=C(c2ccncn2)N1
C1=NC(c2ccccn2)N=C(c2ccccn2)N1c1ccccn1
C1=NC(c2ccccn2)NNC(c2ccccn2)=N1
C1=NC(c2nc(-c3ccccc3)nc(-c3ccccc3)n2)=CNC1
C1=NC(c2nc3ccccc3s2)=CC1
C1=NC(c2nc3ccccc3s2)=CNC1
C1=NC(c2ncc(-c3ccccn3)c(-c3ccccn3)n2)=CNC1
C1=NC(c2nnc(-c3ccccn3)c(-c3ccccn3)n2)=CNC1
C1=NC=C2C=C2c2ccccc2ON1
C1=NC=C2N=C(c3ccncc3)N[SH]12
C1=NC=NC1c1nnc(-c2ccccn2)c(-c2ccccn2)n1
C1=NCC(=CCCCc2ncc[nH]2)N1
C1=NCC(c2nn[nH]n2)=N1
C1=NCC=C(c2nc3ccccc3o2)C1c1nc2ccccc2o1
C1=NCC=C1C1CCc2ccccc21
C1=NCC=C1CCNCCc1ccccc1
C1=NCC=C1CCOCCc1ccccc1
C1=NCC=C1Oc1ccnc2ccccc12
C1=NCC=C1c1cnc2ccccc2n1
C1=NCC=C1c1nc(-c2ccccc2)nc(-c2ccccc2)n1
C1=NCC=NC1c1nc2ccccc2s1
C1=NCCC(c2nc3ccccc3o2)=C1c1nc2ccccc2o1
C1=NCCC2CCCCC12
C1=NCCN=C1c1nc2ccccc2s1
C1=NCC[SH]1c1nccc(-n2cccn2)n1
C1=NCNC=C1c1nc(-c2ccccc2)nc(-c2ccccc2)n1
C1=NCOC(c2ccncc2)=NN1
C1=NN(c2cccc3ccccc23)C(c2sccc2-c2cccs2)S1
C1=NN2C=C2C=C1c1ncc[nH]1
C1=NN2C=c3c1c1ccc4ccccc4c1cc3=CO2
C1=NN=C(c2ccccc2)C(c2ccccn2)=Nc2cccnc21
C1=NN=C(c2ccccc2)C1
C1=NN=C(c2ccccn2)C(c2ccccn2)=Nc2cccnc21
C1=NN=C(c2ccncn2)Nc2ccccc2OC=C1c1ccccn1
C1=NN=Cc2ncccc2NC(c2ccccn2)c2ccccc21
C1=NNC(c2ccccc2)O1
C1=NNCC(c2cccc(-c3c[nH]cn3)n2)=C1
C1=NNCC(c2ccccc2)=N1
C1=NNCC12CCCCC2C1CCCC1
C1=NOCC(c2ccccc2)=C1
C1=Nc2c1cnc1nccnc21
C1=Nc2ccccc2C(c2ccccn2)O1
C1=Nc2ccccc2C1=COc1ccccc1
C1=Nc2ccccc2C1Oc1ccccc1
C1=Nc2ccccc2C1Sc1ccccc1
C1=Nc2ccccc2C1Sc1ccccn1
C1=Nc2ccccc2CC1Oc1ccccc1
C1=Nc2cccnc2C2=CCOC1=C2
C1=Nc2cccnc2C=NN(c2ccccc2)Oc2ncccc21
C1=Nc2ncccc2C1Sc1ccccc1
C1=c2[nH]cc(C3CCNCC3)c2=CNC1
C1=c2c(-c3ccccc3)nc(c3ccccc23)=Nc2ccccc21
C1=c2c(-c3ccccc3)noc2=NCO1
C1=c2c(ccc3cccnc23)=NNC1
C1=c2cc(-c3ccccn3)c3cncn3c2=C1
C1=c2cc(-c3ncc[nH]3)cnc2=CCS1
C1=c2cc(C3Cc4ccccc4C3)ccc2=N1
C1=c2cc3nccnc3nc2=C1
C1=c2ccc(CCOCCc3ccccc3)cc2=C1
C1=c2ccc(COCNCc3ccccc3)cc2=C1
C1=c2ccc3cccnc3c2=CNO1
C1=c2ccc3nsnc3c2=N1
C1=c2ccccc2=NC(c2ccccc2)C1c1ccccn1
C1=c2ccccc2=NC1c1ccccn1
C1=c2nc(-c3cc[nH]c3-c3cccs3)sc2=C1
C1=c2nc(CCCCc3ncc[nH]3)[nH]c2=C1
C1=c2nc(CCCCc3ncco3)[nH]c2=C1
C1=c2nc3nccnc3nc2=C1
C1=c2ncc(-c3nn[nH]n3)nc2=C1
C1=c2oc3ccc4cccnc4c3c2=C1
C1CC2CC3CC(C1)C2CCN3
C1CC2CC3CC(C2)C(C1)CN3
C1CC2CC3NC2CCC3C1
C1CC2CCC3C(C1)NC3NC2
C1CC2CCC3CC(C2)NC3C1
C1CC2CCC3CC(CC2C3)N1
C1CC2CCC3CC(NC3C1)O2
C1CC2CCC3CC2NC3C1
C1CC2CCC3CNN(C1)C2C3
C1CC2CCC3NC(C2)C3C1
C1CCC(C2CCCCCO2)CC1
C1CCC(C2CCCCOC2)CC1
C1CCC(C2CCCCOCC2)CC1
C1CCC(CC23CCCC2C3)CC1
C1CCC(CC2CC3CC(C2)C3)CC1
C1CCC(CC2CC3CC3C2)CC1
C1CCC(CC2CCC3CC23)CC1
C1CCC(CC2CCCC2)CC1
C1CCC(CC2CCCCCO2)CC1
C1CCC(CC2CCCCN2)CC1
C1CCC(CC2CCCCO2)CC1
C1CCC(CC2CCCO2)CC1
C1CCC(CC2CCCOC2)CC1
C1CCC(CC2CCCOCC2)CC1
C1CCC(CC2CCNCC2)CC1
C1CCC(CC2CCOCC2)CC1
C1CCC(CC2CCOCOC2)CC1
C1CCC(CC2CNCCOC2)CC1
C1CCC(CCC2CCCC2)CC1
C1CCC(CCC2CCCO2)CC1
C1CCC(CCOC2CCC2)CC1
C1CCC(CN2CC3CCC2C3)C1
C1CCC(CN2CCCCC2)CC1
C1CCC(CN2CCOCC2)CC1
C1CCC(CNC2CCCC2)CC1
C1CCC(CNC2CCCO2)CC1
C1CCC(CNC2CCOC2)CC1
C1CCC(COC2CCCC2)CC1
C1CCC(COCC2CCC2)CC1
C1CCC(COCCC2CC2)CC1
C1CCC(OC2CCC3CC3C2)CC1
C1CCC(OC2CCCC2)CC1
C1CCC(OC2CCCCC2)CC1
C1CCC(OCC2CCCO2)CC1
C1CCC(OCCC2CCC2)CC1
C1CCC2(CC1)C1CCCCC2C1
C1CCC2C(C1)CC1CC2N1
C1CCC2C(C1)CNC1CC12
C1CCC2C3CC(C1)CN2C3
C1CCC2C3CNC2C(C1)C3
C1CCC2CC3(CCCC3)CC2C1
C1CCC2CC3CC(CC1)C2N3
C1CCC2CC3CCC(CC3)N2CC1
C1CCC2CCCCC2CNC1
C1CCC2CCN3NC2C3CC1
C1CCC2CCNC2CC1
C1CCC2CCNCC2CC1
C1CCC2CCNCCC2C1
C1CCC2CCNCCCC2C1
C1CCC2CNCCC2C1
C1CCCC(C2CCCCC2)CC1
C1CCCC(COCC2CC2)CC1
C1CCCC(NCC2CCCCN2)CCC1
C1CCCC(NCC2NCCCN2)CCC1
C1CCCC(NCCC2CCCNC2)CC1
C1CCCC(OCCN2CCCNC2)CC1
C1CCCC2NCCC2CC1
C1CCCC2NCOCC2CC1
C1Cc2nnnn2-c2nnnn2N1
C1NCn2nnnc2N1
C1OCC2COC3C1COC23
C=C(Br)C(=O)OC(C)C
C=C(Br)C(=O)OCCCCCCC
C=C(Br)C(C)C1(C#N)CCCC1
C=C(Br)C(CCCCCC)COC
C=C(Br)C(F)=COCC(F)(F)C(F)F
C=C(Br)C(O)COCCCCCC
C=C(Br)CC(=O)OCC
C=C(C(=NC=NC)c1ccc(N)cc1C(F)(F)F)C(F)(F)F
C=C(C(=O)CCCOCC(C)C)C(C)=CC=CC(=O)OCCCCCCCCC
C=C(C(C)=O)C(N)=O
C=C(C(C)C)C1(C#N)CCCC1
C=C(C(C)C)C1(C#N)CCCC1=O
C=C(C(C)C)C1(C#N)CCCCC1
C=C(C(C)C)C1(CC)CCCC1
C=C(C(C)C)C1(CO)CCCC1
C=C(C(C)C)C1(CO)CCCC1=O
C=C(C(C)C)C1(O)CCCCC1=O
C=C(C(C)O)C1(C#N)CCCC1
C=C(C(N)=O)C(C)c1ccccc1F
C=C(C(N)=O)C(C)c1ccco1
C=C(C(N)=O)C(C)c1cccs1
C=C(C)C(=O)C(C)(C#N)CC(C)(C)OC(F)(F)F
C=C(C)C(=O)C(C)(SC)c1cccc2ccccc12
C=C(C)C(=O)C(C)CCCCC
C=C(C)C(=O)C(C)CCCCCCCCCN(C)C
C=C(C)C(=O)C(C)CCOCCCCCCN(C)C
C=C(C)C(=O)C(C)OCCCC
C=C(C)C(=O)C(C)OCCO
C=C(C)C(=O)C(CO)CCCCC
C=C(C)C(=O)C1(C)CCC2N1CCC2(C)C
C=C(C)C(=O)C=CC=CC(=C)C(=O)c1ccc(OC(=O)N(C)C)cc1
C=C(C)C(=O)CC(C#N)CCCCC
C=C(C)C(=O)CC(CO)CCCCC
C=C(C)C(=O)CC1CCCC1CCCCCN(C)C
C=C(C)C(=O)CCCCCCCCC
C=C(C)C(=O)CCCCCOC(=O)N(C)C
C=C(C)C(=O)CCCCCOC(=O)c1sccc1C
C=C(C)C(=O)CCCCOC(=O)C(C)C
C=C(C)C(=O)CCCCS(=O)(=O)O
C=C(C)C(=O)CCCOC(=O)c1ccc(F)cc1C(=O)OC
C=C(C)C(=O)CCCOC(=O)c1ccc2c(c1)C(=O)OC2(C)C
C=C(C)C(=O)CCCOC(=O)c1ccc2c(c1)C(=O)OC2(Cl)Cl
C=C(C)C(=O)CCCOC(=O)c1ccc2c(c1)C(=O)OC2C#N
C=C(C)C(=O)CCOC(=O)Nc1ccc2c(c1)C(=O)OC2=O
C=C(C)C(=O)CCOC(=O)c1ccc2c(c1)C(N)=NC2=O
C=C(C)C(=O)CCOCCO
C=C(C)C(=O)COC(=O)CCCC
C=C(C)C(=O)COC(=O)N1COC(=O)c2cc(Cl)ccc2C1
C=C(C)C(=O)COC(=O)Nc1ccc2c(c1)C(=O)NC2=O
C=C(C)C(=O)COC(=O)Nc1ccc2c(c1)C(=O)OC2=O
C=C(C)C(=O)COC(C)CCC
C=C(C)C(=O)COC(CC)CCCC
C=C(C)C(=O)COC=CC(C)CCC
C=C(C)C(=O)COCCCCCC
C=C(C)C(=O)COCCCCCCC
C=C(C)C(=O)COCCOC(=O)CSC
C=C(C)C(=O)COCCOCCO
C=C(C)C(=O)COCCOCCOC(=O)Nc1ccccc1
C=C(C)C(=O)COCCS(=O)(=O)O
C=C(C)C(=O)NC=CC=C(C=CF)SCCNS(=O)(=O)c1ccccc1
C=C(C)C(=O)NCC(CC)CCC
C=C(C)C(=O)NCC(CO)CCC
C=C(C)C(=O)NCC(CO)OC(=O)N(C)C
C=C(C)C(=O)NCC(CO)OC(=O)NC(C)C
C=C(C)C(=O)NCC1C2CCC1(C)C2(C)C
C=C(C)C(=O)NCCCCCCC
C=C(C)C(=O)NCCCCCCCC
C=C(C)C(=O)NCCCCOC(=O)C(=O)c1ccccc1
C=C(C)C(=O)NCCCCOC(=O)NC
C=C(C)C(=O)NCCCCOC(=O)c1sccc1C
C=C(C)C(=O)NCCCCOCCC
C=C(C)C(=O)NCCCOCCC
C=C(C)C(=O)NCCCOCCCC
C=C(C)C(=O)NCCCS(=O)(=O)OC(C)=O
C=C(C)C(=O)NCCCS(N)(=O)=O
C=C(C)C(=O)NCCOC(=O)c1ccc2c(=O)on(C)c2c1
C=C(C)C(=O)NCCOCCOC(=O)N(C)c1ccccc1
C=C(C)C(=O)NCc1ccc(C(=O)c2cccc(NC(=O)N(C)C)c2)cc1
C=C(C)C(=O)Nc1ccc(C(=O)c2ccc(NC(=O)C(C)C)cc2)cc1
C=C(C)C(=O)Nc1ccc(C(=O)c2ccccc2)cc1
C=C(C)C(=O)OC(=O)C1CNCCC1(C)C
C=C(C)C(=O)OC(=O)OCN(C)C
C=C(C)C(=O)OC(C#N)CCCC
C=C(C)C(=O)OC(C#N)CCCCC
C=C(C)C(=O)OC(C(C)(C)O)C(F)(F)F
C=C(C)C(=O)OC(C)(C)C(F)(F)C(F)(F)F
C=C(C)C(=O)OC(C)(C)CC(C)C(F)(F)F
C=C(C)C(=O)OC(C)(C)CCC
C=C(C)C(=O)OC(C)(C=CC(F)F)CC(F)F
C=C(C)C(=O)OC(C)(CC)S(=O)(=O)C(F)(F)F
C=C(C)C(=O)OC(C)(F)C(F)(F)C(C)(C)C
C=C(C)C(=O)OC(C)(F)C(F)(F)C(F)F
C=C(C)C(=O)OC(C)(F)C(F)(F)CC(F)(F)F
C=C(C)C(=O)OC(C)(F)c1c(F)ccc(Br)c1F
C=C(C)C(=O)OC(C)C(C)CC
C=C(C)C(=O)OC(C)CCC
C=C(C)C(=O)OC(C)CCCC
C=C(C)C(=O)OC(C)CCCCCC
C=C(C)C(=O)OC(C)CCCCCCCCN(C)C
C=C(C)C(=O)OC(C)CCOCCCCCN(C)C
C=C(C)C(=O)OC(C)COCCCCCCN(C)C
C=C(C)C(=O)OC(C)COCCOCCOC(=O)c1sccc1C
C=C(C)C(=O)OC(C=CC(F)(F)F)C(F)(F)F
C=C(C)C(=O)OC(CC)CCCC=CC
C=C(C)C(=O)OC(CC)CCCCOC
C=C(C)C(=O)OC(F)(F)C(C#N)C(C)(C)C
C=C(C)C(=O)OC(F)(F)C(C#N)C(C)(C)C1CC1
C=C(C)C(=O)OC(F)(F)C(C)(C#N)C(F)(F)F
C=C(C)C(=O)OC(F)(F)C(C)(C)C(C)(F)F
C=C(C)C(=O)OC(F)(F)C(C)(C)C(O)C(F)F
C=C(C)C(=O)OC(F)(F)C(C)(C)CC(F)F
C=C(C)C(=O)OC(F)(F)C(C)c1cccc(F)c1F
C=C(C)C(=O)OC(F)(F)C(F)(F)C(C)(C)C
C=C(C)C(=O)OC(F)(F)C(F)(F)C(C)C(F)F
C=C(C)C(=O)OC(F)(F)C(F)(F)C(C)C1CC1
C=C(C)C(=O)OC(F)(F)C(F)(F)C(C)c1ccccc1
C=C(C)C(=O)OC(F)(F)C(F)(F)C(F)(F)CC
C=C(C)C(=O)OC(F)(F)C(F)(F)COc1cc(F)cs1
C=C(C)C(=O)OC(F)(F)C(F)(F)OCC(F)F
C=C(C)C(=O)OC(F)(F)C(F)C(C)(C)C(F)F
C=C(C)C(=O)OC(F)(F)C=C(F)C(F)=CO
C=C(C)C(=O)OC(F)(F)c1c(Br)ccc(C)c1F
C=C(C)C(=O)OC12CCCCC1(C)C2C
C=C(C)C(=O)OC1=CC=C(SCc2ccccc2CC)C1
C=C(C)C(=O)OC1C(=O)CC(C)C1(C)C
C=C(C)C(=O)OC1C2CCC1(C)C2(C)OC
C=C(C)C(=O)OC1C2CCCC1(C)C2C
C=C(C)C(=O)OC1C=C2C=CC1(C)C2(C)C
C=C(C)C(=O)OC1C=CSC(CNc2ccccc2)=N1
C=C(C)C(=O)OC1CC(=O)NCC(C)C1
C=C(C)C(=O)OC1CC12CC(=O)CC2OC
C=C(C)C(=O)OC1CC1CCCC
C=C(C)C(=O)OC1CC1CCCCC
C=C(C)C(=O)OC1CC2C(OC)CC13CC23
C=C(C)C(=O)OC1CC2CC1SCCC2(C)C
C=C(C)C(=O)OC1CC2CCC(C1)C2(C)C
C=C(C)C(=O)OC1CC2CCC1(C)C2(C)C(F)F
C=C(C)C(=O)OC1CC2CCC1(C)C2(C)C1CC1
C=C(C)C(=O)OC1CC2CCC1(C)C2(C)CC
C=C(C)C(=O)OC1CC2CCC1(C)C2(C)Cl
C=C(C)C(=O)OC1CC2CCC1(C)C2(C)O
C=C(C)C(=O)OC1CC2CCC1(C)C21CCCCC1
C=C(C)C(=O)OC1CC2CCC1(C)C2C(C)C
C=C(C)C(=O)OC1CC2CCC1(C)C2CCC
C=C(C)C(=O)OC1CC2CCC1(C)C2COC
C=C(C)C(=O)OC1CC2CCC1(C)C2OC
C=C(C)C(=O)OC1CC2CCC1(C)C2OC(C)C
C=C(C)C(=O)OC1CC2CCC1(C)C2OC1CC1
C=C(C)C(=O)OC1CC2CCC1(C)C2OCC
C=C(C)C(=O)OC1CC2CCC1(C)N2OCC1CC1
C=C(C)C(=O)OC1CC2CCC1(C)[SH]2OC
C=C(C)C(=O)OC1CC2CCC1(F)C2(C)C
C=C(C)C(=O)OC1CC2CCC1(F)C2C
C=C(C)C(=O)OC1CC2OCC1(C)C2(C)C
C=C(C)C(=O)OC1CCC2CC(COC)C1(C)C2
C=C(C)C(=O)OC1CCC2CC1(C)C2(F)F
C=C(C)C(=O)OC1CCCC12NCCC2OC
C=C(C)C(=O)OC1CCCC1CCCCCN(C)C
C=C(C)C(=O)OC1CCCC23CCC12C=CN3CCC
C=C(C)C(=O)OC1CCCCC1(C)C(=O)N1CCCC1
C=C(C)C(=O)OC1CCCCC1(C)C1CCCC(=O)C1
C=C(C)C(=O)OC1CCCCC1(C)N(C)C
C=C(C)C(=O)OC1CCCCC12OC=CC2Br
C=C(C)C(=O)OC1CCCCC12OC=CC2C(F)F
C=C(C)C(=O)OC1CCCCC12OC=CC2OC
C=C(C)C(=O)OC1CCCCC1CCCCN(C)C
C=C(C)C(=O)OC1CN2CCC1(C)C2C
C=C(C)C(=O)OC1CNCCC(CC)C1
C=C(C)C(=O)OC1COC(=O)c2ccc(F)cc2S1(=O)=O
C=C(C)C(=O)OC1COC(=O)c2ccc3cc2CC(=O)N31
C=C(C)C(=O)OC=C1C=CC(C(=O)c2ccc(OC(C)(N)O)cc2)=C1
C=C(C)C(=O)OC=C1C=CC(CNC=Cc2ccccc2)=C1
C=C(C)C(=O)OC=CC(CC)CC
C=C(C)C(=O)OC=CC(CC)CCC
C=C(C)C(=O)OC=CC(CC)CCC=CC
C=C(C)C(=O)OC=CC=C([NH])C(=O)c1ccccc1
C=C(C)C(=O)OC=CC=CCCCCCCN(C)C
C=C(C)C(=O)OC=Cc1ccccc1C(=O)c1ccccc1
C=C(C)C(=O)OCC
C=C(C)C(=O)OCC#CCCCC
C=C(C)C(=O)OCC#CCCCCC
C=C(C)C(=O)OCC#CCCO
C=C(C)C(=O)OCC#CCOC(=O)C(C)C
C=C(C)C(=O)OCC#CCOCC
C=C(C)C(=O)OCC#CCOCCO
C=C(C)C(=O)OCC(=O)CCC
C=C(C)C(=O)OCC(=O)CCCC
C=C(C)C(=O)OCC(=O)CCCCCCC(=O)OC
C=C(C)C(=O)OCC(=O)CCCCCCCN(C)C
C=C(C)C(=O)OCC(=O)Cc1ccc2c(c1)C(=O)NC2=O
C=C(C)C(=O)OCC(=O)Nc1ccc2c(c1)CC(=O)C2
C=C(C)C(=O)OCC(=O)Nc1ccc2nc(C)oc(=O)c2c1
C=C(C)C(=O)OCC(=O)Nc1ccccc1-c1cc(=O)n(CC)s1
C=C(C)C(=O)OCC(=O)Oc1ccc2c(c1)CC(O)C2=O
C=C(C)C(=O)OCC(C#N)CCC
C=C(C)C(=O)OCC(C#N)CCCC
C=C(C)C(=O)OCC(C#N)OC(=O)N(C)C
C=C(C)C(=O)OCC(C#N)OC(=O)c1sccc1C
C=C(C)C(=O)OCC(C#N)OCC(=O)N(C)C
C=C(C)C(=O)OCC(C)CC1CCCC1
C=C(C)C(=O)OCC(C)CCC
C=C(C)C(=O)OCC(C)CCCC
C=C(C)C(=O)OCC(C)CCCCC
C=C(C)C(=O)OCC(C)CCCCCCCN(C)C
C=C(C)C(=O)OCC(C)CCCCCCCOC
C=C(C)C(=O)OCC(C)CCCCOC
C=C(C)C(=O)OCC(C)CCOCCO
C=C(C)C(=O)OCC(C)OCCCC
C=C(C)C(=O)OCC(C)OCCOCCOC(=O)NCc1ccccc1
C=C(C)C(=O)OCC(CC)CC
C=C(C)C(=O)OCC(CC)CC1CCCCC1
C=C(C)C(=O)OCC(CC)CCC
C=C(C)C(=O)OCC(CC)OCCC
C=C(C)C(=O)OCC(CC)OCCCC
C=C(C)C(=O)OCC(CO)CCC
C=C(C)C(=O)OCC(CO)CCCC
C=C(C)C(=O)OCC(CO)CCCC=CC
C=C(C)C(=O)OCC(CO)CCCCC
C=C(C)C(=O)OCC(CO)OC(=O)C(=O)C1CC1
C=C(C)C(=O)OCC(CO)OC(=O)C(=O)c1ccccc1
C=C(C)C(=O)OCC(CO)OC(=O)C(C)C
C=C(C)C(=O)OCC(CO)OC(=O)C(C)c1ccccc1
C=C(C)C(=O)OCC(CO)OC(=O)CN(C)C
C=C(C)C(=O)OCC(CO)OC(=O)CN(C)c1ccccc1
C=C(C)C(=O)OCC(CO)OC(=O)COC
C=C(C)C(=O)OCC(CO)OC(=O)COc1ccccc1
C=C(C)C(=O)OCC(CO)OC(=O)CSc1ccccc1
C=C(C)C(=O)OCC(CO)OC(=O)N(C)C
C=C(C)C(=O)OCC(CO)OC(=O)N(C)c1ccccc1
C=C(C)C(=O)OCC(CO)OC(=O)N1CCCCC1
C=C(C)C(=O)OCC(CO)OC(=O)N1CCCCCC1
C=C(C)C(=O)OCC(CO)OC(=O)NC
C=C(C)C(=O)OCC(CO)OC(=O)NC(C)C
C=C(C)C(=O)OCC(CO)OC(=O)NC(C)c1ccccc1
C=C(C)C(=O)OCC(CO)OC(=O)NCC
C=C(C)C(=O)OCC(CO)OC(=O)Nc1ccccc1
C=C(C)C(=O)OCC(CO)OC(=O)Sc1ccc(C)cn1
C=C(C)C(=O)OCC(CO)OC(=O)Sc1ccccc1F
C=C(C)C(=O)OCC(CO)OC(=O)[SH](C)C
C=C(C)C(=O)OCC(CO)OC(=O)c1ccccc1F
C=C(C)C(=O)OCC(CO)OC(=O)c1cccs1
C=C(C)C(=O)OCC(CO)OC(=O)c1nc(C)cs1
C=C(C)C(=O)OCC(CO)OC(=O)c1sccc1C
C=C(C)C(=O)OCC(CO)OC(C)N(C)C
C=C(C)C(=O)OCC(CO)OC(N)=O
C=C(C)C(=O)OCC(CO)OCC(=O)N(C)C
C=C(C)C(=O)OCC(CO)OCC(=O)NC1CCCC1
C=C(C)C(=O)OCC(CO)OCC(=O)NCC1CC1
C=C(C)C(=O)OCC(CO)OCC(=O)Nc1ccccc1
C=C(C)C(=O)OCC(CO)OCCC#N
C=C(C)C(=O)OCC(CO)OCCS(=O)C1CC1
C=C(C)C(=O)OCC(F)(F)C(F)C(C)(C)C
C=C(C)C(=O)OCC(O)(O)CNC(C)=O
C=C(C)C(=O)OCC(O)COC(=O)C(C)C
C=C(C)C(=O)OCC1(CO)OC(=O)N1C
C=C(C)C(=O)OCC12CCC1(C)C2(C)O
C=C(C)C(=O)OCC1C2CCC1(C)C2(C)C
C=C(C)C(=O)OCC1C2CCC1(C)S2(=O)=O
C=C(C)C(=O)OCC1COc2ccccc2C(=O)C(C)C1=O
C=C(C)C(=O)OCC1CS(=O)(=O)O1
C=C(C)C(=O)OCC1OCCN1c1ccc2c(c1)OC(=O)C2=O
C=C(C)C(=O)OCC=CCCCC
C=C(C)C(=O)OCCC#CCCC
C=C(C)C(=O)OCCC(=O)N(C)O
C=C(C)C(=O)OCCC(=O)NC(C)OC
C=C(C)C(=O)OCCC(=O)NC(O)CO
C=C(C)C(=O)OCCC(=O)NCCO
C=C(C)C(=O)OCCC(C)CCC
C=C(C)C(=O)OCCC(CC)CC
C=C(C)C(=O)OCCC(CC)CCC
C=C(C)C(=O)OCCC(CO)OC(=O)Nc1ccccc1
C=C(C)C(=O)OCCC1(O)C=CCO1
C=C(C)C(=O)OCCC1CC(C)CC1(C)C
C=C(C)C(=O)OCCC1CCC(C)C1(C)C
C=C(C)C(=O)OCCC1ON=C(C)S1
C=C(C)C(=O)OCCC=C(N)C(C)O
C=C(C)C(=O)OCCCC(=O)CCCCCCCC1CCCCC1=O
C=C(C)C(=O)OCCCC(=O)NCC(C)C
C=C(C)C(=O)OCCCC(=O)Oc1sccc1C
C=C(C)C(=O)OCCCC(C)CCCCC(=O)OC
C=C(C)C(=O)OCCCC1OCCC[SH]1C
C=C(C)C(=O)OCCCCC(=O)CCCCSC
C=C(C)C(=O)OCCCCC1CCC(C(C)C)CO1
C=C(C)C(=O)OCCCCC1CCCCC1CCCCN(C)C
C=C(C)C(=O)OCCCCCC
C=C(C)C(=O)OCCCCCC(=O)CCCCc1ccoc1
C=C(C)C(=O)OCCCCCC1CCCCC1C
C=C(C)C(=O)OCCCCCC1CCCCC1CO
C=C(C)C(=O)OCCCCCCC
C=C(C)C(=O)OCCCCCCC(=O)CCCCCCN(C)C
C=C(C)C(=O)OCCCCCCC1CC=CC=C1C
C=C(C)C(=O)OCCCCCCC1CCCC=C1C
C=C(C)C(=O)OCCCCCCC1CCCCC1C
C=C(C)C(=O)OCCCCCCC1CCCCC1OC
C=C(C)C(=O)OCCCCCCC1CCCCN1C
C=C(C)C(=O)OCCCCCCC1CCCCN1C(C)=O
C=C(C)C(=O)OCCCCCCC1CCCCN1C(C)C
C=C(C)C(=O)OCCCCCCC1CCCCN1CC
C=C(C)C(=O)OCCCCCCC1CCCCO1
C=C(C)C(=O)OCCCCCCCC1CCCCN1C
C=C(C)C(=O)OCCCCCCCC1CCCCN1CC
C=C(C)C(=O)OCCCCCCCC1CCCCO1
C=C(C)C(=O)OCCCCCCCCC
C=C(C)C(=O)OCCCCCCCCC1C=CCN1C
C=C(C)C(=O)OCCCCCCCCC1CCCN(C)C1
C=C(C)C(=O)OCCCCCCCCC1CCCN1CC
C=C(C)C(=O)OCCCCCCCCC1CCCO1
C=C(C)C(=O)OCCCCCCCCC1COC2CCCCN2C1
C=C(C)C(=O)OCCCCCCCCCC
C=C(C)C(=O)OCCCCCCCCCC1CCCCC1C
C=C(C)C(=O)OCCCCCCCCCC1CCCCC1COC
C=C(C)C(=O)OCCCCCCCCCC1CCCCN1CC
C=C(C)C(=O)OCCCCCCCCCC1CCOC(=O)C1
C=C(C)C(=O)OCCCCCCCCCCC
C=C(C)C(=O)OCCCCCCCCCCC1CCCCC1=O
C=C(C)C(=O)OCCCCCCCCCCC1CCCCC1COC
C=C(C)C(=O)OCCCCCCCCCCC1CCCCC1Cc1ccccc1
C=C(C)C(=O)OCCCCCCCCCCC1CCCCC1OC
C=C(C)C(=O)OCCCCCCCCCCCC(C)=O
C=C(C)C(=O)OCCCCCCCCCCCC1CCCCN1C
C=C(C)C(=O)OCCCCCCCCCc1ccoc1C
C=C(C)C(=O)OCCCCCCCCOC
C=C(C)C(=O)OCCCCCCCOC
C=C(C)C(=O)OCCCCCCCOCC1CCCCC1C
C=C(C)C(=O)OCCCCCCCc1ccsc1C
C=C(C)C(=O)OCCCCCCNCC
C=C(C)C(=O)OCCCCCCOCC1CCCN1C
C=C(C)C(=O)OCCCCCCOCCC1CCN(C)CC1
C=C(C)C(=O)OCCCCCCOCCCC1CCCCC1COCC
C=C(C)C(=O)OCCCCCNCCCc1ccn(C)c1C
C=C(C)C(=O)OCCCCCO
C=C(C)C(=O)OCCCCCOCC1CCCCN1C
C=C(C)C(=O)OCCCCCOCC1CCCCN1CC
C=C(C)C(=O)OCCCCCOCCCC1CCN(C)C1CC
C=C(C)C(=O)OCCCCCOCCCCC1CCCCC1C
C=C(C)C(=O)OCCCCCOCCCCC1CCCCN1C(C)C
C=C(C)C(=O)OCCCCCOCCCCC=CN(C)C
C=C(C)C(=O)OCCCCCOCCCc1ccsc1C
C=C(C)C(=O)OCCCCN1CCOCC1C
C=C(C)C(=O)OCCCCNC(=O)C(=O)c1ccccc1
C=C(C)C(=O)OCCCCNC(=O)C(C)C
C=C(C)C(=O)OCCCCNC(=O)C(C)c1ccccc1
C=C(C)C(=O)OCCCCNCCC(F)(F)CC
C=C(C)C(=O)OCCCCNCCOCCCCN(C)C
C=C(C)C(=O)OCCCCNCCOc1c(F)cccc1F
C=C(C)C(=O)OCCCCOC(=O)C(=O)C1CC1
C=C(C)C(=O)OCCCCOC(=O)C(=O)CC
C=C(C)C(=O)OCCCCOC(=O)C(=O)c1ccccc1
C=C(C)C(=O)OCCCCOC(=O)C(C)(C)C
C=C(C)C(=O)OCCCCOC(=O)C(C)=CC
C=C(C)C(=O)OCCCCOC(=O)C(C)=O
C=C(C)C(=O)OCCCCOC(=O)C(C)C
C=C(C)C(=O)OCCCCOC(=O)C1=CC=CC=CC1
C=C(C)C(=O)OCCCCOC(=O)CN(C)C
C=C(C)C(=O)OCCCCOC(=O)CNc1ccccc1F
C=C(C)C(=O)OCCCCOC(=O)COc1ccccc1
C=C(C)C(=O)OCCCCOC(=O)CSC
C=C(C)C(=O)OCCCCOC(=O)CSc1ccccc1
C=C(C)C(=O)OCCCCOC(=O)CSc1ccccc1F
C=C(C)C(=O)OCCCCOC(=O)Cc1ccccc1F
C=C(C)C(=O)OCCCCOC(=O)Cn1cccc1
C=C(C)C(=O)OCCCCOC(=O)N(C)C
C=C(C)C(=O)OCCCCOC(=O)N(C)C=CC
C=C(C)C(=O)OCCCCOC(=O)N(C)Cc1ccccc1
C=C(C)C(=O)OCCCCOC(=O)N(C)c1ccccc1
C=C(C)C(=O)OCCCCOC(=O)NC
C=C(C)C(=O)OCCCCOC(=O)Nc1ccccc1
C=C(C)C(=O)OCCCCOC(=O)SC
C=C(C)C(=O)OCCCCOC(=O)Sc1sccc1C
C=C(C)C(=O)OCCCCOC(=O)c1cccs1
C=C(C)C(=O)OCCCCOC(=O)c1scc2c1CC2
C=C(C)C(=O)OCCCCOC(=O)c1sccc1C
C=C(C)C(=O)OCCCCOC(=O)c1sccc1C1CC1
C=C(C)C(=O)OCCCCOC(=O)c1sccc1CC
C=C(C)C(=O)OCCCCOC(=O)c1sccc1F
C=C(C)C(=O)OCCCCOCC(=O)Nc1ccccc1
C=C(C)C(=O)OCCCCOCCC
C=C(C)C(=O)OCCCCOCCCC1CCCN1CC
C=C(C)C(=O)OCCCCOCCCSC
C=C(C)C(=O)OCCCCOCCN(C)c1ccccc1
C=C(C)C(=O)OCCCCOCCO
C=C(C)C(=O)OCCCCOCc1ccc(F)cc1
C=C(C)C(=O)OCCCCOc1ccsc1-c1ccccc1
C=C(C)C(=O)OCCCCOc1ccsc1C1CC1
C=C(C)C(=O)OCCCN(C)C(=O)OC
C=C(C)C(=O)OCCCN(C)S(=O)(=O)O
C=C(C)C(=O)OCCCN(C)S(=O)O
C=C(C)C(=O)OCCCN(C)[SH](=O)=O
C=C(C)C(=O)OCCCN(CC)C(C)O
C=C(C)C(=O)OCCCN(OC)C(N)=O
C=C(C)C(=O)OCCCN1CCOC[SH]1C
C=C(C)C(=O)OCCCNCCC
C=C(C)C(=O)OCCCNCCCC
C=C(C)C(=O)OCCCNCCCCCCC1CCCN1C
C=C(C)C(=O)OCCCNS(C)(=O)=O
C=C(C)C(=O)OCCCOC
C=C(C)C(=O)OCCCOC(=O)C(C)=Cc1ccccc1
C=C(C)C(=O)OCCCOC(=O)C(C)C
C=C(C)C(=O)OCCCOC(=O)CN(C)C
C=C(C)C(=O)OCCCOC(=O)CNc1ccccc1
C=C(C)C(=O)OCCCOC(=O)COc1ccccc1
C=C(C)C(=O)OCCCOC(=O)CSC(C)=CF
C=C(C)C(=O)OCCCOC(=O)CSOCC
C=C(C)C(=O)OCCCOC(=O)CSc1ccccc1
C=C(C)C(=O)OCCCOC(=O)NCC1CCCC1
C=C(C)C(=O)OCCCOC(=O)Nc1sccc1C
C=C(C)C(=O)OCCCOC(=O)c1ccc(F)cc1NC(C)=O
C=C(C)C(=O)OCCCOC(=O)c1ccc(O)cc1C(=O)OC
C=C(C)C(=O)OCCCOC(=O)c1sccc1C
C=C(C)C(=O)OCCCOCCCC
C=C(C)C(=O)OCCCOCCCCC
C=C(C)C(=O)OCCCOCCO
C=C(C)C(=O)OCCCOCCOC(=O)c1ccccc1
C=C(C)C(=O)OCCCS(=O)(=O)CO
C=C(C)C(=O)OCCCS(=O)(=O)N(C)C
C=C(C)C(=O)OCCCS(=O)(=O)NCCO
C=C(C)C(=O)OCCCS(=O)(=O)NCO
C=C(C)C(=O)OCCCS(=O)(=O)OC
C=C(C)C(=O)OCCCS(=O)(=O)OC(C)C
C=C(C)C(=O)OCCCS(=O)(=O)OCCO
C=C(C)C(=O)OCCCS(=O)(=O)OO
C=C(C)C(=O)OCCCS(=O)C(=O)O
C=C(C)C(=O)OCCCS(C)(=O)=O
C=C(C)C(=O)OCCCS(N)(=O)=O
C=C(C)C(=O)OCCCSC(=O)N(C)N
C=C(C)C(=O)OCCCSC(N)=O
C=C(C)C(=O)OCCC[SH]1OCN=C1N
C=C(C)C(=O)OCCNC(=O)Cc1ccc(F)cc1OC(F)(F)F
C=C(C)C(=O)OCCNC(=O)c1ccc2c(c1)C(=O)OC2=O
C=C(C)C(=O)OCCNCCCC
C=C(C)C(=O)OCCNCCCCC
C=C(C)C(=O)OCCNCCCCCCc1ccc(C)cc1
C=C(C)C(=O)OCCOC(=CN(C)C)c1cccc(Cl)c1
C=C(C)C(=O)OCCOC(=O)C1CCC1
C=C(C)C(=O)OCCOC(=O)C1CCO1
C=C(C)C(=O)OCCOC(=O)C=C1C=C(C)C(=O)N(C)C1=O
C=C(C)C(=O)OCCOC(=O)C=C1C=CNC(=O)C(N(C)C)=C(CC)C1=C
C=C(C)C(=O)OCCOC(=O)C=C1C=c2[nH]c(=O)c(=O)oc2=C1
C=C(C)C(=O)OCCOC(=O)C=CC1=C(C)C=C(N)C1=O
C=C(C)C(=O)OCCOC(=O)C=Cc1c(C)cc(O)cc1Br
C=C(C)C(=O)OCCOC(=O)C=Cc1nc(C#N)c(N)cc1C
C=C(C)C(=O)OCCOC(=O)CC
C=C(C)C(=O)OCCOC(=O)CCCOC(=O)c1occc1C
C=C(C)C(=O)OCCOC(=O)CCCOCCOC(=O)CC
C=C(C)C(=O)OCCOC(=O)COCC1COCS1(=O)=O
C=C(C)C(=O)OCCOC(=O)COCCOC(=O)CN(C)C
C=C(C)C(=O)OCCOC(=O)COCCOC(=O)N(C)C
C=C(C)C(=O)OCCOC(=O)COCCOC(=O)NC1CC1
C=C(C)C(=O)OCCOC(=O)COCCOC(=O)Nc1ccccc1
C=C(C)C(=O)OCCOC(=O)COCCOCC(=O)Nc1ccccc1
C=C(C)C(=O)OCCOC(=O)COCCOCCSCc1ccccc1
C=C(C)C(=O)OCCOC(=O)NCC1C2CC(C(=O)CC(=O)NCCO)CCOC1C2
C=C(C)C(=O)OCCOC(=O)NCCC(C)CC1(C(=O)NCCN2CCOCC2)CCOC1
C=C(C)C(=O)OCCOC(=O)NCCC1CCCOCC1COC(=O)CSCCOC
C=C(C)C(=O)OCCOC(=O)Nc1cc(C)cccccoc1=O
C=C(C)C(=O)OCCOC(=O)Nc1ccc(C)cc1OC(F)(F)F
C=C(C)C(=O)OCCOC(=O)Nc1ccc2c(c1)C(=O)OC2=O
C=C(C)C(=O)OCCOC(=O)c1ccc(-c2ccoc2)oc1=O
C=C(C)C(=O)OCCOC(=O)c1ccc(Cl)cc1C(=O)NC
C=C(C)C(=O)OCCOC(=O)c1ccc(Cl)cc1C(C)(Cl)CC
C=C(C)C(=O)OCCOC(=O)c1ccc(F)cc1C(=O)NC
C=C(C)C(=O)OCCOC(=O)c1ccc2c(=O)oc(=O)[nH]c2c1
C=C(C)C(=O)OCCOC(=O)c1ccc2c(c1)C(=O)NC2=O
C=C(C)C(=O)OCCOC(=O)c1ccc2c(c1)C(=O)OC2
C=C(C)C(=O)OCCOC(=O)c1ccc2c(c1)C(=O)OC2(C)C
C=C(C)C(=O)OCCOC(=O)c1ccc2c(c1)C(=O)OC2(C)Cl
C=C(C)C(=O)OCCOC(=O)c1ccc2c(c1)C(=O)OC2C
C=C(C)C(=O)OCCOC(=O)c1ccc2c(c1)C(=O)OC2C#N
C=C(C)C(=O)OCCOC(=O)c1ccc2c(c1)CN(C)C2
C=C(C)C(=O)OCCOC(=O)c1ccc2c(c1)COC(C)C2=O
C=C(C)C(=O)OCCOC(=O)c1ccc2c(c1)COC2=O
C=C(C)C(=O)OCCOC(=O)c1ccc2c(c1)NC(=O)C2
C=C(C)C(=O)OCCOC(=O)c1ccc2c(c1)NC(=O)C2=O
C=C(C)C(=O)OCCOC(=O)c1ccc2c(c1)NC(=O)CC2=O
C=C(C)C(=O)OCCOC(=O)c1ccc2c(c1)NC(=O)CO2
C=C(C)C(=O)OCCOC(=O)c1ccc2c(c1)OC(=O)C2=O
C=C(C)C(=O)OCCOC(=O)c1ccc2c(c1)OC(C)(C)O2
C=C(C)C(=O)OCCOC(=O)c1ccc2c(c1)OC(C)C2=O
C=C(C)C(=O)OCCOC(=O)c1ccc2cc(C#N)oc(=O)c2c1
C=C(C)C(=O)OCCOC(=O)c1cccc(C(=O)OC(C)=O)c1
C=C(C)C(=O)OCCOC(=O)c1cccc2c1OC(C)(C)CC2
C=C(C)C(=O)OCCOC1CCCCC1CCCCCN(C)C
C=C(C)C(=O)OCCOC1CCCOC1
C=C(C)C(=O)OCCOC1CCOCC1
C=C(C)C(=O)OCCOC1COC(=O)C1C
C=C(C)C(=O)OCCOC1COC(=O)N1C
C=C(C)C(=O)OCCOC1COC(=O)S1
C=C(C)C(=O)OCCOC1COC(=O)[SH]1C
C=C(C)C(=O)OCCOC1COCC(=O)N1C
C=C(C)C(=O)OCCOC1COCCO1
C=C(C)C(=O)OCCOCC(C)C
C=C(C)C(=O)OCCOCC(O)CC(=O)OC
C=C(C)C(=O)OCCOCC1COCC(CC)C1
C=C(C)C(=O)OCCOCC1COCCS1
C=C(C)C(=O)OCCOCC1COCS1
C=C(C)C(=O)OCCOCC1OC(=O)N1C
C=C(C)C(=O)OCCOCC1OC(C)N(C)C12CCC2
C=C(C)C(=O)OCCOCC1OCCCS1(=O)=O
C=C(C)C(=O)OCCOCC1OCCC[SH]1C
C=C(C)C(=O)OCCOCC1OCCO1
C=C(C)C(=O)OCCOCC1OCCS1
C=C(C)C(=O)OCCOCCC
C=C(C)C(=O)OCCOCCCC
C=C(C)C(=O)OCCOCCCCC
C=C(C)C(=O)OCCOCCCCCCC
C=C(C)C(=O)OCCOCCCO
C=C(C)C(=O)OCCOCCCOC
C=C(C)C(=O)OCCOCCCOCC(C)OC(=O)C(C)C
C=C(C)C(=O)OCCOCCN
C=C(C)C(=O)OCCOCCN1CCCCC1
C=C(C)C(=O)OCCOCCN1CCOC1=O
C=C(C)C(=O)OCCOCCN1CCOCC1
C=C(C)C(=O)OCCOCCOC
C=C(C)C(=O)OCCOCCOC(=O)C(=O)C1CC1
C=C(C)C(=O)OCCOCCOC(=O)C(=O)c1ccccc1
C=C(C)C(=O)OCCOCCOC(=O)C(C)=O
C=C(C)C(=O)OCCOCCOC(=O)C(C)C
C=C(C)C(=O)OCCOCCOC(=O)CCOC(=O)C(C)C
C=C(C)C(=O)OCCOCCOC(=O)COCC(=O)NC(C)C
C=C(C)C(=O)OCCOCCOC(=O)COCCC(C)=O
C=C(C)C(=O)OCCOCCOC(=O)COCCN(C)c1ccccc1
C=C(C)C(=O)OCCOCCOC(=O)COc1ccccc1
C=C(C)C(=O)OCCOCCOC(=O)CSC
C=C(C)C(=O)OCCOCCOC(=O)CSCC
C=C(C)C(=O)OCCOCCOC(=O)CSc1ccccc1
C=C(C)C(=O)OCCOCCOC(=O)N(C)C
C=C(C)C(=O)OCCOCCOC(=O)N(C)c1ccccc1
C=C(C)C(=O)OCCOCCOC(=O)N(CC)C1CC1
C=C(C)C(=O)OCCOCCOC(=O)NC
C=C(C)C(=O)OCCOCCOC(=O)NC(C)C
C=C(C)C(=O)OCCOCCOC(=O)NC(C)c1ccccc1
C=C(C)C(=O)OCCOCCOC(=O)Nc1ccccc1
C=C(C)C(=O)OCCOCCOC(=O)Oc1ccccc1F
C=C(C)C(=O)OCCOCCOC(=O)SC1CC1
C=C(C)C(=O)OCCOCCOC(=O)Sc1ccccc1F
C=C(C)C(=O)OCCOCCOC(=O)c1ccccc1
C=C(C)C(=O)OCCOCCOC(=O)c1cccs1
C=C(C)C(=O)OCCOCCOC(=O)c1sccc1C
C=C(C)C(=O)OCCOCCOC(=O)c1sccc1CC
C=C(C)C(=O)OCCOCCOC(C)=O
C=C(C)C(=O)OCCOCCOC(C)Sc1ccccc1F
C=C(C)C(=O)OCCOCCOC(N)=O
C=C(C)C(=O)OCCOCCOCC
C=C(C)C(=O)OCCOCCOCC(=O)N(C)C
C=C(C)C(=O)OCCOCCOCC(=O)NCC1CC1
C=C(C)C(=O)OCCOCCOCC1CCC2C(=O)C(=O)OC2CO1
C=C(C)C(=O)OCCOCCOCCC1Cc2sc(=O)oc2CO1
C=C(C)C(=O)OCCOCCOCCCCC
C=C(C)C(=O)OCCOCCOCCCCOC(=O)CN(C)CC
C=C(C)C(=O)OCCOCCOCCCOC1COC(=O)C12CC2
C=C(C)C(=O)OCCOCCOCCCOCC1OCCN1C
C=C(C)C(=O)OCCOCCOCCCOCCOC#N
C=C(C)C(=O)OCCOCCOCCCOCCOC(=O)NCC
C=C(C)C(=O)OCCOCCOCCCOCCOC(C)=O
C=C(C)C(=O)OCCOCCOCCCOCCOCC(=O)c1ccccc1
C=C(C)C(=O)OCCOCCOCCO
C=C(C)C(=O)OCCOCCOCCOC(=O)N1CCCCCC1
C=C(C)C(=O)OCCOCCOCCOC(=O)OCNC
C=C(C)C(=O)OCCOCCOCCOC1CCCOC1
C=C(C)C(=O)OCCOCCOCCOC1COC(=O)C1
C=C(C)C(=O)OCCOCCOCCOC1COC(=O)C12CC2
C=C(C)C(=O)OCCOCCOCCOC1COC(=O)C1c1ccccc1
C=C(C)C(=O)OCCOCCOCCOC1COC(=O)N1C
C=C(C)C(=O)OCCOCCOCCOC1COC(=O)N1CC
C=C(C)C(=O)OCCOCCOCCOCC1CCC(=O)C(=O)O1
C=C(C)C(=O)OCCOCCOCCOCCOC(=O)CNC
C=C(C)C(=O)OCCOCCOc1ccsc1
C=C(C)C(=O)OCCOCCOc1ccsc1C
C=C(C)C(=O)OCCOCCOc1ccsc1C(C)C
C=C(C)C(=O)OCCOCc1oc(=O)sc1C
C=C(C)C(=O)OCCSc1nnnn1O
C=C(C)C(=O)OCC[SH]1OC(O)=C1C
C=C(C)C(=O)OCCc1csc(=O)o1
C=C(C)C(=O)OCCc1oncc1Br
C=C(C)C(=O)OCCc1scnc1O
C=C(C)C(=O)OCc1cc(C(=O)c2ccccc2)ccnc1=O
C=C(C)C(=O)OCc1ccc(C(=O)c2cccc(OC(=O)C(C)C)c2)cc1
C=C(C)C(=O)OCc1ccc(C(=O)c2cccc(OC(=O)N(C)C)c2)cc1
C=C(C)C(=O)OOC(=O)C(C)C
C=C(C)C(=O)OOC(=O)C(C)N
C=C(C)C(=O)OOC(=O)C(C)c1ccccc1
C=C(C)C(=O)OOC(=O)CN(C)C
C=C(C)C(=O)OOC(=O)COC(C)C
C=C(C)C(=O)OOC(=O)COSC
C=C(C)C(=O)OOC(=O)COc1ccccc1
C=C(C)C(=O)OOC(=O)N(C)C1CC1
C=C(C)C(=O)OOC(=O)N1CCOCC1
C=C(C)C(=O)OOC(=O)NC(C)C
C=C(C)C(=O)OOC(=O)NC(F)F
C=C(C)C(=O)OOC(=O)NC1CC1C
C=C(C)C(=O)OOC(=O)NCC(C)C
C=C(C)C(=O)OOC(=O)OCc1ccccc1
C=C(C)C(=O)OOC(=O)Oc1ccccc1F
C=C(C)C(=O)OOC(=O)Oc1ncccc1C
C=C(C)C(=O)OOC(=O)c1cccs1
C=C(C)C(=O)OOC(=O)c1oncc1C
C=C(C)C(=O)OOC(=O)c1oncc1CC
C=C(C)C(=O)OOC(=O)c1sccc1C
C=C(C)C(=O)OOC(=O)c1sccc1CC
C=C(C)C(=O)OOC(=O)c1scnc1C
C=C(C)C(=O)OOC(C)NC(=O)C1CC1
C=C(C)C(=O)OOC(O)=CC
C=C(C)C(=O)OOCC(=O)N(C)C
C=C(C)C(=O)OOCCNC(N)=O
C=C(C)C(=O)OONC(=O)C(C)C
C=C(C)C(=O)OONC(=O)C(F)(F)F
C=C(C)C(=O)OOOC(=O)C(=O)c1ccccc1
C=C(C)C(=O)OOOC(=O)C(C)=CC
C=C(C)C(=O)OOOC(=O)C(C)C
C=C(C)C(=O)OOOC(=O)C(C)c1ccccc1
C=C(C)C(=O)OOOC(=O)C(F)(F)F
C=C(C)C(=O)OOOC(=O)C=Nc1ccccc1
C=C(C)C(=O)OOOC(=O)CSc1ccccc1
C=C(C)C(=O)OOOC(=O)N(C)C
C=C(C)C(=O)OOOC(=O)N1CCCCCC1
C=C(C)C(=O)OOOC(=O)NCC1CC1
C=C(C)C(=O)OOOC(=O)NCc1ccccc1
C=C(C)C(=O)OOOC(=O)Nc1ccccc1
C=C(C)C(=O)OOOC(=O)Nc1ccccc1F
C=C(C)C(=O)OOOC(=O)Oc1ccccc1
C=C(C)C(=O)OOOC(=O)S
C=C(C)C(=O)OOOC(=O)SC
C=C(C)C(=O)OOOC(=O)Sc1ccccn1
C=C(C)C(=O)OOOC(=O)c1ccco1
C=C(C)C(=O)OOOC(=O)c1sccc1C
C=C(C)C(=O)OOOC(=O)c1sccc1C1CC1
C=C(C)C(=O)OOOC(=O)c1scnc1C
C=C(C)C(=O)OOOC(C)=C(C)SCC
C=C(C)C(=O)OOOC(N)=CC
C=C(C)C(=O)OOOCC(N)=O
C=C(C)C(=O)OOOCCN(C)C1CC1
C=C(C)C(=O)Oc1cc(F)cc(C(F)(F)F)c1F
C=C(C)C(=O)Oc1cc(NC(=O)c2cccs2)ccc1N
C=C(C)C(=O)Oc1ccc(-c2ccc(F)cc2)cc1
C=C(C)C(=O)Oc1ccc(-c2ccc(F)cc2F)cc1
C=C(C)C(=O)Oc1ccc(-c2ncc(F)cc2F)cc1
C=C(C)C(=O)Oc1ccc(C(=O)C(C)(C)C)cc1
C=C(C)C(=O)Oc1ccc(C(=O)C(F)(F)F)cc1
C=C(C)C(=O)Oc1ccc(C(=O)C2CCCCC2)cc1
C=C(C)C(=O)Oc1ccc(C(=O)C=C2C=CC(OCC(=O)NCCC)=C2)cc1
C=C(C)C(=O)Oc1ccc(C(=O)C=CC=CNC)cc1
C=C(C)C(=O)Oc1ccc(C(=O)C=Cc2ccccc2)cc1
C=C(C)C(=O)Oc1ccc(C(=O)CC2CC2)cc1C
C=C(C)C(=O)Oc1ccc(C(=O)CCC(=O)N(C)C(=O)NC2CC2)cc1
C=C(C)C(=O)Oc1ccc(C(=O)Cc2cccs2)cc1
C=C(C)C(=O)Oc1ccc(C(=O)N2C=CC(C(=O)NC(C)C)=CC2)cc1
C=C(C)C(=O)Oc1ccc(C(=O)N2C=CC(OCC(=O)CC)C=C2)cc1
C=C(C)C(=O)Oc1ccc(C(=O)N2CC=CC2=O)cc1
C=C(C)C(=O)Oc1ccc(C(=O)N2CCCC2C)cc1
C=C(C)C(=O)Oc1ccc(C(=O)N2CCCCC2)cc1
C=C(C)C(=O)Oc1ccc(C(=O)NC2CCC(OCC(=O)NCCC)C2)cc1
C=C(C)C(=O)Oc1ccc(C(=O)NCCC(C)C)cc1
C=C(C)C(=O)Oc1ccc(C(=O)Nc2cccs2)cc1
C=C(C)C(=O)Oc1ccc(C(=O)Nc2ccsc2)cc1
C=C(C)C(=O)Oc1ccc(C(=O)c2cc(O)oc2C(=O)NCCC)cc1
C=C(C)C(=O)Oc1ccc(C(=O)c2ccc(F)cc2)cc1
C=C(C)C(=O)Oc1ccc(C(=O)c2ccc(NC(=O)N(C)C)cc2)cc1
C=C(C)C(=O)Oc1ccc(C(=O)c2ccc(OC(=O)C(C)C)cc2)cc1
C=C(C)C(=O)Oc1ccc(C(=O)c2ccc(OC(=O)N(C)C)cc2)cc1
C=C(C)C(=O)Oc1ccc(C(=O)c2cccc(C(=O)NC(C)C)c2)cc1
C=C(C)C(=O)Oc1ccc(C(=O)c2cccc(OC(=O)C(N)=O)c2)cc1
C=C(C)C(=O)Oc1ccc(C(=O)c2cccc(OC(=O)N(C)C)c2)cc1
C=C(C)C(=O)Oc1ccc(C(=O)c2ccccc2)cc1C
C=C(C)C(=O)Oc1ccc(C(=O)c2ccccc2)nc1
C=C(C)C(=O)Oc1ccc(C(=O)c2ccccn2)cc1
C=C(C)C(=O)Oc1ccc(C(=O)c2cccnc2)cc1
C=C(C)C(=O)Oc1ccc(C(C)(F)C2CC2)cc1
C=C(C)C(=O)Oc1ccc(C(C)=O)cc1-c1ccccc1
C=C(C)C(=O)Oc1ccc(C(C)=O)cc1C
C=C(C)C(=O)Oc1ccc(C(C)=O)cc1OC
C=C(C)C(=O)Oc1ccc(C(C)C)cc1C(=O)c1ccccc1
C=C(C)C(=O)Oc1ccc(C(C)c2ccccc2)cc1
C=C(C)C(=O)Oc1ccc(CN2CCCC2=O)cc1
C=C(C)C(=O)Oc1ccc(Cl)c(C)c1-c1ccccc1
C=C(C)C(=O)Oc1ccc(Cl)cc1-c1ccccn1
C=C(C)C(=O)Oc1ccc(NC(=O)C2C=CCC2)cc1
C=C(C)C(=O)Oc1ccc(NC(=O)c2cccs2)cc1
C=C(C)C(=O)Oc1ccc(NC(=O)c2cccs2)nc1
C=C(C)C(=O)Oc1ccc(NCC=C2C=CC(NC(=O)NCCOC)=CC2C)cc1
C=C(C)C(=O)Oc1ccc(Nc2ccc(F)cc2)cc1
C=C(C)C(=O)Oc1ccc(Nc2cccc(F)c2)cc1
C=C(C)C(=O)Oc1ccc(OC(=O)C2=CC=C(OCCN(C)CCC)C2)cc1
C=C(C)C(=O)Oc1ccc(OC(=O)c2ccc[nH]2)cc1
C=C(C)C(=O)Oc1ccc(OC(=O)c2cccs2)cc1
C=C(C)C(=O)Oc1ccc(Oc2ccc(F)cc2)cc1
C=C(C)C(=O)Oc1ccc(S(=O)(=O)C(C)(O)NC(=O)CCC)cc1
C=C(C)C(=O)Oc1ccc(S(=O)(=O)C(C)C)cc1
C=C(C)C(=O)Oc1ccc(S(=O)(=O)C(F)F)cc1
C=C(C)C(=O)Oc1ccc(S(=O)(=O)C2CC2)cc1
C=C(C)C(=O)Oc1ccc(S(=O)N2CCCCC2)cc1
C=C(C)C(=O)Oc1ccc(S(=O)c2ccc(OC(=O)C(C)C)cc2)cc1
C=C(C)C(=O)Oc1ccc(S(=O)c2ccc(OC(=O)N(C)C)cc2)cc1
C=C(C)C(=O)Oc1ccc(SC(=O)c2ccccc2)cc1
C=C(C)C(=O)Oc1ccc(SC(=O)c2cccs2)cc1C
C=C(C)C(=O)Oc1ccc(SC(C)CC#N)cc1
C=C(C)C(=O)Oc1ccc(SCC(=O)c2cccs2)cc1
C=C(C)C(=O)Oc1ccc(SCc2ccccc2)cn1
C=C(C)C(=O)Oc1ccc(SCc2ccccc2C#N)cc1
C=C(C)C(=O)Oc1ccc2cncc(-c3ccccc3Cl)c2c1
C=C(C)C(=O)Oc1cccc(NC(=O)c2ccccc2)c1
C=C(C)C(=O)c1cccc(C(=O)c2ccncc2)c1
C=C(C)C(C(F)F)C(C(=O)c1ccccc1)c1cccs1
C=C(C)C(C)(C)C=C(F)NC(=O)c1ccccc1
C=C(C)C(C)(C)CCCCCC
C=C(C)C(C)(C)CCCCCCCCCCN(C)C
C=C(C)C(C)(C)CCCCCCCCN(C)C1CC1
C=C(C)C(C)(C)OC(=O)c1ccc2c(c1)C(=O)OC2=O
C=C(C)C(C)(C)OC(=O)c1ccc2c(c1)C(=O)OC2C
C=C(C)C(C)(C)OCCOC(=O)CC
C=C(C)C(C)(O)C(F)(F)C(F)(F)C(F)F
C=C(C)C(C)=Nc1cc(NC(C)=O)ccc1-c1ccccc1
C=C(C)C(C)=Nc1ccccc1C(=O)c1ccc(OC(=O)N(C)C)cc1
C=C(C)C(C)C(C=C(C)OC(F)(F)F)C(F)(F)F
C=C(C)C(C)C1(C#N)CCCC1
C=C(C)C(C)C1(CO)CCCC1
C=C(C)C(C)CCOC(=O)Cc1ccc2c(c1)C(=O)OC2=O
C=C(C)C(C)CNCCCOCCCC
C=C(C)C(C)NCCCCCCCC
C=C(C)C(C)NCCOCCCCC
C=C(C)C(C)OCC(=O)NCc1ccc2c(c1)C(=O)OC2=O
C=C(C)C(C)OCCCCCCCC
C=C(C)C(C)OCCCCCCCCC
C=C(C)C(C)OCCOC(=O)c1ccc2c(c1)C(=O)OC2=O
C=C(C)C(C)OCCOCCOC(=O)c1sccc1CC
C=C(C)C(C)Oc1ccc(C(=O)c2ccc(N(C)C(=O)CC)cc2)cc1
C=C(C)C(C)Oc1ccc(OC(=O)c2cccs2)cc1
C=C(C)C(CC)NCCOCCOCCO
C=C(C)C(CC)OC1CC1CCCC
C=C(C)C(CCC)CCCC(CC)CC
C=C(C)C(CCCCC)OCCCC
C=C(C)C(CCCCCCC)COC
C=C(C)C(CCCCN(C)C)C(=O)CCCCCC
C=C(C)C(CCCCN(C)C)COCCCCCCOC
C=C(C)C(CCCCN(C)C1CC1)C(=O)CCCCOC
C=C(C)C(CCCOC)OC(=O)c1ccc2c(c1C)OC(=O)C2=O
C=C(C)C(CCO)CCS(=O)(=O)O
C=C(C)C(CCO)COC(=O)c1ccc2c(c1)C(=O)OC2(C)C
C=C(C)C(CCO)COCCO
C=C(C)C(CCO)COCCOC
C=C(C)C(COC)C(CC)CCC
C=C(C)C(COC)COC(=O)c1ccc2c(c1)C(=O)OC2=O
C=C(C)C(COC)COCCCCC
C=C(C)C(COC)OCCOCCO
C=C(C)C(COCCC)S(=O)(=O)O
C=C(C)C(N)(C#N)C(F)(F)C(F)(F)C(F)F
C=C(C)C(N)C(=O)NCC(=O)O
C=C(C)C(N)C(=O)NCC(N)=O
C=C(C)C(N)C(C)(F)C(F)(F)C(F)(F)F
C=C(C)C(N)CCOCCO
C=C(C)C(N)CCOCCOCCO
C=C(C)C(O)(Cl)C(F)(F)C(F)C(F)(F)F
C=C(C)C(O)C#CCOCCO
C=C(C)C(O)C(=O)CCC(=O)CCCCCCCN(C)C
C=C(C)C(O)C(=O)CCCCC
C=C(C)C(O)C(=O)NCCOc1ccc2c(c1)C(=O)OC2=O
C=C(C)C(O)C(C)CCCCC
C=C(C)C(O)C(C)OC(=O)c1ccc2c(c1)C(=O)NC2=O
C=C(C)C(O)C(O)C(O)CO
C=C(C)C(O)C(O)CCOCCOCCOC(=O)C(C)C
C=C(C)C(O)C=CCOCCCCC
C=C(C)C(O)CC(=O)OCCO
C=C(C)C(O)CC(C)CCCCC
C=C(C)C(O)CC(CC)CCCC
C=C(C)C(O)CC(CC)CCCCC
C=C(C)C(O)CC(CC)OCCCC
C=C(C)C(O)CC(CO)CCCCC
C=C(C)C(O)CC1CC2CCC1(C)C2(C)C
C=C(C)C(O)CCC(CC)CCC
C=C(C)C(O)CCCC(=O)CCC=C(C)C
C=C(C)C(O)CCCCCCC
C=C(C)C(O)CCCCCCCC
C=C(C)C(O)CCCCCCCCC
C=C(C)C(O)CCCCCCCCCC
C=C(C)C(O)CCCCCCOCC
C=C(C)C(O)CCCCNCCCC
C=C(C)C(O)CCCCOCCC
C=C(C)C(O)CCCCS(=O)(=O)O
C=C(C)C(O)CCCS(=O)(=O)O
C=C(C)C(O)CCOC(=O)CCOCC
C=C(C)C(O)CCOC(=O)Nc1ccc2c(c1)C(=O)OC2=O
C=C(C)C(O)CCOC(=O)c1ccc2c(c1)C(=O)NCC2=O
C=C(C)C(O)CCOCCCCC
C=C(C)C(O)CCOCCCCCC
[truncated: 42,003 more rows]
